# Supplementary material for: Experiences of preparing children for a death of an important adult during the COVID-19 pandemic: a mixed methods study
Source: PubMed Central journal article supplement — BMJ Open. 2021 Aug 16;11(8):e053099. doi: 10.1136/bmjopen-2021-053099 (PMC8370837; doi:10.1136/bmjopen-2021-053099), 2021-08-16
Supplement: bmjopen-2021-053099.draft_revisions.pdf [file bmjopen-2021-053099.draft_revisions.pdf]

# BMJ Open

BMJ Open is committed to open peer review. As part of this commitment we make the peer review history of every article we publish publicly available.

When an article is published we post the peer reviewers' comments and the authors' responses online. We also post the versions of the paper that were used during peer review. These are the versions that the peer review comments apply to.

The versions of the paper that follow are the versions that were submitted during the peer review process. They are not the versions of record or the final published versions. They should not be cited or distributed as the published version of this manuscript.

BMJ Open is an open access journal and the full, final, typeset and author-corrected version of record of the manuscript is available on our site with no access controls, subscription charges or pay-per-view fees (<http://bmjopen.bmj.com>).

If you have any questions on BMJ Open's open peer review process please email [info.bmjopen@bmj.com](mailto:info.bmjopen@bmj.com)

# BMJ Open

## Experiences of preparing children for a death of an important adult during the COVID-19 pandemic: A mixed methods study

|                               |                                                                                                                                                                                                                                                                                                                                                                                                                              |
|-------------------------------|------------------------------------------------------------------------------------------------------------------------------------------------------------------------------------------------------------------------------------------------------------------------------------------------------------------------------------------------------------------------------------------------------------------------------|
| Journal:                      | <i>BMJ Open</i>                                                                                                                                                                                                                                                                                                                                                                                                              |
| Manuscript ID                 | bmjopen-2021-053099                                                                                                                                                                                                                                                                                                                                                                                                          |
| Article Type:                 | Original research                                                                                                                                                                                                                                                                                                                                                                                                            |
| Date Submitted by the Author: | 05-May-2021                                                                                                                                                                                                                                                                                                                                                                                                                  |
| Complete List of Authors:     | Rapa, Elizabeth; Oxford University, Department of Psychiatry<br>Hanna, Jeffrey; Oxford University, Department of Psychiatry<br>Mayland, C; The University of Sheffield, Department of Oncology and Metabolism; University of Liverpool, Palliative Care Institute Liverpool<br>Mason, Stephen; University of Liverpool, Palliative Care Institute Liverpool<br>Dalton, Louise J; Oxford University, Department of Psychiatry |
| Keywords:                     | COVID-19, PALLIATIVE CARE, Adult palliative care < PALLIATIVE CARE                                                                                                                                                                                                                                                                                                                                                           |
|                               |                                                                                                                                                                                                                                                                                                                                                                                                                              |

SCHOLARONE™  
Manuscripts



I, the Submitting Author has the right to grant and does grant on behalf of all authors of the Work (as defined in the below author licence), an exclusive licence and/or a non-exclusive licence for contributions from authors who are: i) UK Crown employees; ii) where BMJ has agreed a CC-BY licence shall apply, and/or iii) in accordance with the terms applicable for US Federal Government officers or employees acting as part of their official duties; on a worldwide, perpetual, irrevocable, royalty-free basis to BMJ Publishing Group Ltd ("BMJ") its licensees and where the relevant Journal is co-owned by BMJ to the co-owners of the Journal, to publish the Work in this journal and any other BMJ products and to exploit all rights, as set out in our [licence](#).

The Submitting Author accepts and understands that any supply made under these terms is made by BMJ to the Submitting Author unless you are acting as an employee on behalf of your employer or a postgraduate student of an affiliated institution which is paying any applicable article publishing charge ("APC") for Open Access articles. Where the Submitting Author wishes to make the Work available on an Open Access basis (and intends to pay the relevant APC), the terms of reuse of such Open Access shall be governed by a Creative Commons licence – details of these licences and which [Creative Commons](#) licence will apply to this Work are set out in our licence referred to above.

Other than as permitted in any relevant BMJ Author's Self Archiving Policies, I confirm this Work has not been accepted for publication elsewhere, is not being considered for publication elsewhere and does not duplicate material already published. I confirm all authors consent to publication of this Work and authorise the granting of this licence.

1  
2  
3  
4  
5  
6  
7  
8  
9  
10  
11  
12  
13  
14  
15  
16  
17  
18  
19  
20  
21  
22  
23  
24  
25  
26  
27  
28  
29  
30  
31  
32  
33  
34  
35  
36  
37  
38  
39  
40  
41  
42  
43  
44  
45  
46  
47  
48  
49  
50

# Experiences of preparing children for a death of an important adult during the COVID-19 pandemic: A mixed methods study

Elizabeth Rapa,<sup>1</sup> $\alpha$

Jeffrey R. Hanna,<sup>1</sup> $\alpha$ \*

Catriona R. Mayland,<sup>2,3</sup>

Stephen R. Mason,<sup>2</sup>

&

Louise J Dalton<sup>1</sup>

51 \* indicates corresponding author [jeffrey.hanna@psych.ox.ac.uk](mailto:jeffrey.hanna@psych.ox.ac.uk)

52  $\alpha$  indicates joint first authors for this manuscript

53 1. Department of Psychiatry, University of Oxford, Warneford Hospital, Oxford, OX3 7JX

54 2. Palliative Care Institute Liverpool, University of Liverpool, North West Cancer Research  
55 Centre, 200 London Road, Liverpool, L3 9TA

56 3. Department of Oncology and Metabolism, University of Sheffield, 2<sup>nd</sup> Floor Broomcross  
57 Building, Weston Park Hospital, Whitham Road, Sheffield, S10 2SJ

1  
2  
3 Dr. Elizabeth Rapa <https://orcid.org/0000-0001-8818-8148>

4  
5 Dr. Jeffrey R. Hanna <https://orcid.org/0000-0002-8218-5939>

6  
7 Dr. Stephen R. Mason <https://orcid.org/0000-0002-4020-6869>

8  
9 Dr. Catriona R. Mayland <https://orcid.org/0000-0002-1440-9953>

10  
11 Dr. Louise J. Dalton <https://orcid.org/0000-0003-1923-5769>

12  
13  
14  
15  
16  
17  
18  
19  
20  
21  
22  
23  
24  
25  
26  
27  
28  
29  
30  
31  
32  
33  
34  
35  
36  
37  
38  
39  
40  
41  
42  
43  
44  
45  
46  
47  
48  
49  
50  
51  
52  
53  
54  
55  
56  
57  
58  
59  
60

For peer review only

## ABSTRACT

**Objective:** The objectives of this study were to investigate how families prepared children for the death of a significant adult, and how health and social care professionals provided psychosocial support to families about a relative's death during the COVID-19 pandemic.

**Design/Setting:** A mixed-methods design; an observational survey with health and social care professionals and relatives bereaved during the COVID-19 pandemic in the United Kingdom, and in-depth interviews with bereaved relatives and professionals were conducted. Data were analysed thematically.

**Participants:** A total of 623 participants completed the survey and interviewed were conducted with 19 bereaved relatives and 16 professionals.

**Results:** Many children were not prepared for a death of an important adult during the pandemic. Obstacles to preparing children included families' lack of understanding about their relative's declining health; parental beliefs that not telling children was protecting them from upset; and parents' uncertainty about how best to prepare their children for the death. Professionals did not provide families with psychosocial support to facilitate preparation, and resources were less available or inappropriate for families during the pandemic. Three themes were identified: (1) obstacles to telling children a significant adult is going to die, (2) professionals' role in helping families to prepare children for the death of a significant adult during the pandemic, and (3) how families prepare children for the death of a significant adult.

**Conclusions:** Professionals need to: provide clear and honest communication about a poor prognosis; start a conversation with families about the dying patient's significant relationships with children; and reassure families that telling children someone close to them is dying is beneficial for their longer-term psychological adjustment.

**KEYWORDS:** end of life, COVID-19, communication, children, family, health professionals, social care professionals, psychosocial support

### Strengths and limitations of the study

- First known study that has included quantitative measures about family-centred conversations in end of life care.
- To promote study rigour, second interviews were conducted with some participants to provide clarity on their end of life experiences during the pandemic.
- Findings are limited to an ethnically homogenous White population.

## BACKGROUND

Families are often unsure how best to prepare children (<18 years old) for the death of someone involved in their lives.<sup>1</sup> Literature reports that even when a death is expected the reality of a family member's poor prognosis is not fully shared with children.<sup>2,3</sup> Clear and honest communication with children about the declining health and impending death of a significant adult can promote psychosocial adjustment for children, including better mental and physical health outcomes and fewer referrals to psychiatric services.<sup>4,5</sup>

Parents within family groups have reported a desire and need for advice and guidance from health and social care professionals (HSCPs) about how, when, and what they should tell children regarding an impending death.<sup>1,2,6</sup> Despite the unique positioning of clinical services, families have highlighted a lack of supportive care from HSCPs about how to prepare and support children for a significant death.<sup>2,7</sup> HSCPs have reported family-centred conversations as an emotionally challenging aspect of their clinical role, often perceiving this to be the role of other healthcare colleagues<sup>8,9,10</sup>

Provision of family-centred care in clinical practice is likely to have been affected by the COVID-19 pandemic in the United Kingdom, including the increased practical and emotional pressures encountered by HSCPs<sup>11,12</sup>, and the absence of families visiting in hospital, care home and hospice settings. Exploration of bereaved relatives' and HSCPs' experiences and perceptions will aid our understanding of how families navigated preparing children for a death during the COVID-19 crisis. This will help inform current and future clinical practice on how families can be better supported as they prepare children for a bereavement.

### Aims and objectives

The aim of this study was to explore how families prepared children for a death during the COVID-19 pandemic in the United Kingdom. The objectives were to investigate:

- (1) how families navigated telling children someone close to them was going to die, and
- (2) professionals' role in supporting families as they prepared children for a death.

## METHODS

### Design and context

A mixed-methods design was used for this study<sup>13</sup>; (1) relatives bereaved during the pandemic and HSCPs who provided end of life care during the same period completed an

1  
2  
3 observational, open online survey, and (2) survey respondents who expressed an interest to  
4 provide further information were invited, via email, and participated in an in-depth qualitative  
5 interview regarding their experiences.  
6  
7  
8  
9

10 This study was embedded within a national quantitative United Kingdom survey of  
11 relatives' and HSCPs' views about end of life experiences during the COVID-19 pandemic.  
12  
13  
14

### 15 **Patient and public involvement**

16  
17 Five members from the online advisory panel of the Clinical Research and Innovation  
18 Office at Sheffield Teaching Hospitals NHS Trust, and the lead PPI representative from the  
19 Clinical Cancer Trials Executive Committee provided input to survey development. PPI  
20 involvement was helpful for ensuring the language/questioning was appropriate, and resulted  
21 in revisions, such as the inclusion of additional response criteria, such as adding 'don't know'.  
22  
23  
24  
25  
26

### 27 **Participants**

#### 28 *Bereaved relatives*

29  
30 The survey was completed by individuals ( $\geq 18$  years old) who experienced the death  
31 of a family member or close friend during the first wave of the COVID-19 pandemic (March  
32 – June 2020) in the United Kingdom. Of the 48 respondents that expressed an interest to be  
33 involved in follow-up research, a total of 19 relatives were interviewed; 28 potential  
34 participants did not respond to the interview invitation, and one declined.  
35  
36  
37  
38  
39  
40

#### 41 *HSCPs*

42  
43 The survey was completed by HSCPs who provided end of life care during the first and  
44 second waves (March – December 2020) of the COVID-19 pandemic in the United Kingdom.  
45 For simplicity, the term 'HSCP' is used as a collective term to describe the range of  
46 professionals involved in end of life care and support. Seventy-eight respondents expressed an  
47 interest to be involved in follow up research. Of these, 16 took part in a qualitative interview;  
48 60 did not respond to the invitation, and two replied stating they were no longer interested.  
49  
50  
51  
52  
53  
54

### 55 **Data collection**

56  
57 An online survey was developed using the Qualtrics platform. Initially, respondents  
58 were asked to select if they were a bereaved friend/relative or a HSCP. The survey included  
59 questions about support for families in relation to preparing children for a death during the  
60



1  
2  
3 COVID-19 pandemic; questions were developed by the research team (see supplementary file).  
4 Appropriate demographic questions were asked, including age, gender and ethnicity, and  
5 relationship to the deceased or clinical role. The survey was promoted through social media  
6 platforms; public and charitable organisations related to palliative care and bereavement; and  
7 organisations of minoritised groups between June and September 2020.  
8  
9

10  
11  
12  
13 Semi-structured interviews were carried out between July and December 2020. Topic  
14 guides (Table 1) were developed, informed by the literature, the study's aims and objectives,  
15 and the research team who have a wealth of research and clinical experience in end of life and  
16 bereavement care. Interviews were conducted by two female researchers, neither of whom had  
17 prior relationships with the participants. Interviews were conducted on Zoom (n = 9) or  
18 telephone (n = 26), audio-recorded, and lasted between 20 and 98 minutes.  
19  
20  
21  
22  
23  
24

25  
26 Audio-recordings were transcribed *verbatim* after all interviews were completed and  
27 verified by the research team. Preliminary analysis identified some of the categories developed  
28 from the transcript data required further clarification. Following discussion as a research team  
29 and a protocol/ethical amendment, JRH invited eight participants via email to take part in a  
30 second interview to provide clarity on their experiences. Four bereaved relatives and two  
31 HSCPs agreed to another interview. Two bereaved relatives declined the invitation due to a  
32 lack of interest to take part in further studies. The topic guide was iteratively modified by the  
33 authors who are experienced clinicians and researchers in family-centred care (Table 1).  
34 Second interviews were conducted by JRH on Zoom, April 2021, audio-recorded and lasted  
35 between 16 and 31 minutes.  
36  
37  
38  
39  
40  
41  
42  
43  
44

#### 45 **Data analysis**

46 Quantitative data were analysed using descriptive statistics within SPSS v.26. The  
47 qualitative data was analysed using reflexive thematic analysis.<sup>14</sup> JRH read and reread the  
48 transcripts to gain a sense of each participant's story; manually coded the data by marking  
49 similar phrases or words from participant's narratives; and identified where some of them  
50 constructed into themes, in combination with the quantitative data. This approach was  
51 undertaken to enhance and illustrate study findings.<sup>15</sup> ER and LJD independently reviewed the  
52 data resulting in the inclusion of one theme and renaming of two sub-themes. Themes were  
53 refined through critical dialogue with all authors.  
54  
55  
56  
57  
58  
59  
60

## Ethical considerations

Respondents opted into the study and were provided with written information about the research and provided consent prior to participation. Participants were not coerced to answer questions within the survey and each question was optional. Respondents were only contacted to take part in interviews if they expressed an interest to be invited to provide further information. Oral consent was also collected at time of interview. Participants were aware of their right to pause, reschedule or terminate the interview. Data protection procedures were observed, and assurances of confidentiality were provided. Ethical approvals were obtained from University of Liverpool Central University Research Ethics Committee [Ref: 7761].

## RESULTS

### Quantitative survey participants

A total of 278 United Kingdom based bereaved relatives (216 female, 59 male, 3 non-binary or other) completed the survey. The mean age of respondents was 53.4 years (range 19 – 87 years), and with a single exception, all were from a White British ethnic group. The respondents' relationship with the deceased included son/daughter (n = 174), spouse/partner (n = 22), parent (n = 4), son/daughter in-law (n = 12), niece/nephew (n = 13), grandchild (n = 19), sibling (n = 6), friend (n = 14) and other (n = 14). The age of the deceased ranged from 22 to 103 years (mAvgAge = 81.6 years, SD 12.2). Most of the deaths took place in England (n = 179). In total, 345 HSCPs completed the survey, which included nurses (n = 155), doctors (n = 114), allied health professionals (n = 28), social care professionals (n = 2), volunteers (n = 5), and healthcare assistants (n = 23). Eighteen professionals did not provide details about their role.

### Qualitative interviews participants

Overall, nineteen relatives (12 female, 7 male) and sixteen HSCPs (11 female, 5 male) were interviewed. The relative's relationship with their family member varied, including spouse/partner (n = 4); son/daughter in-law (n = 2); adult child (n = 11); grandchild (n = 1); and niece (n = 1). Most relatives reported the deceased had significant relationships with children, including parent (n = 2), grandparent (n = 14), and aunt/uncle (n = 3). The deceased were aged 50 – 59 years (n = 1), 60 – 69 years (n = 3), 70 – 79 years (n = 3), 80 – 89 (n = 9) or 90 years and over (n = 3). A range of HSCPs were involved, including registered nurses (n = 4); clinical nurse specialists (n = 3); team leaders (nurse) (n = 2); medical consultants (n = 2);

1  
2  
3 junior doctors (n = 2), as well as a social worker; chaplain; and healthcare assistant. Additional  
4 sample characteristics are reported in Table 2.  
5  
6  
7

8  
9 The data below describes relatives' and HSCPs' experiences and perceptions of the  
10 final weeks and days of life. Of the participants interviewed, relatives reported their dying  
11 family member was receiving care at a care home (n = 9) or hospital (n = 10) at end of life.  
12 Additionally, most relatives interviewed reported their dying family member was living with a  
13 chronic illness, and at a point during the pandemic their health condition had rapidly  
14 deteriorated; most also tested positive for COVID-19 (n = 13). HSCPs interviewed worked in  
15 acute (n = 10) and community (n = 6) settings. Data is discussed under three themes: (1)  
16 obstacles to telling the children a significant adult is going to die, (2) HSCPs' role in helping  
17 families to prepare children for the death of a significant adult during the pandemic, and (3)  
18 how families prepare children for the death of a significant adult.  
19  
20  
21  
22  
23  
24  
25  
26

### 27 **Theme 1: Obstacles to telling children a significant adult is going to die**

28  
29 Where a significant adult had a poor prognosis, some relatives and HSCPs reported  
30 children had been informed and regularly updated by their parents about the declining health  
31 and impending death. In other families, children were reported by relatives and professionals  
32 as less prepared for the death. These issues are further discussed under two sub-themes (1)  
33 parental beliefs that not telling children was protecting their children from distress, and (2) the  
34 family's lack of understanding about the decline in their loved one's health.  
35  
36  
37  
38  
39  
40

#### 41 **Sub-theme 1: Parental beliefs that not telling children was protecting their children from** 42 **distress**

43  
44 Relatives and professionals reflected that parents within the family network were  
45 unsure how they could tell their children that a significant adult was going to die or what age-  
46 appropriate language to use. Additionally, relatives reported that the children's parents were  
47 concerned about how children would react to the news. More often, relatives felt it was better  
48 *not* to tell the children about the seriousness of the family member's condition, in order to  
49 protect them from becoming upset.  
50  
51  
52  
53  
54  
55

56  
57 *"I don't think they [referring to adult children] mentioned it then through his illness*  
58 *really. They weren't mentioning it on a daily basis or anything. They didn't think it was right*  
59 *to tell them [referring to dependent children] that their granda wasn't going to make it. I just*  
60

1  
2  
3 *think they didn't want to make them sad at that time" [Bereaved relative; spouse of the*  
4 *deceased; hospital-based death; first interview]*  
5  
6  
7

8  
9  
10 Although most relatives reported an awareness that their family member's death was  
11 expected within weeks or days, it often seemed that the children continued to be less informed  
12 of the situation. On occasions, young children (<12 years old) in the family asked their parents  
13 to see (physically or virtually) their dying family member. At times, parents told their children  
14 'you can't visit granny because of the virus but you hopefully will see her soon' or 'grandpa is  
15 very sick today but maybe tomorrow he will be better, and you can talk to him then'. Relatives  
16 and professionals considered this deliberate strategy was an attempt by parents to protect their  
17 children from distress.  
18  
19  
20  
21  
22

## 23 24 **Sub-theme 2: The family's lack of understanding about the decline in their loved one's** 25 **health**

26  
27 Some families reported an absence of clear information from HSCPs about their family  
28 member's condition at end of life; consequently, adult family members reflected that they  
29 themselves were unprepared for the death. On occasions, relatives felt they were provided with  
30 'false hope' regarding their family member's condition when healthcare teams used phrases  
31 such as 'there has been no change and your mum is comfortable' or 'things are just the same  
32 and he is doing okay'. Consequently, relatives stated that parents within the family network  
33 were not aware of the severity of the situation, resulting in parental uncertainty about whether  
34 or how to share this information with their children. Relatives reflected it would have been  
35 helpful if HSCPs had used clear language such as 'dying' and 'end of life' when describing the  
36 patient's condition to the family.  
37  
38  
39  
40  
41  
42  
43  
44  
45

46  
47 *"Mum went into the hospital on the Friday around midnight and died on Sunday. I was*  
48 *ringing the hospital every few hours and they just kept saying 'she's still the same and she's*  
49 *comfortable'. We took that as good news that she was doing okay. And that's what we told the*  
50 *girls. That was all we knew, until I got the call on Sunday morning telling me to get to hospital*  
51 *right away as mum only had a few hours to live."* [Bereaved relative; adult children of the  
52 *deceased; hospital death; second interview]*  
53  
54  
55  
56  
57

## 58 **Theme 2: HSCPs' role in helping families to prepare children for a significant death** 59 **during the pandemic** 60

1  
2  
3  
4  
5 Professionals provided varying amounts of psychosocial support to families during the  
6 pandemic, but on many occasions specific support in preparing children for a death was not  
7 offered. These issues are discussed under two sub-themes: (1) a lack of family-centred  
8 conversations, and (2) psychosocial support provided to families with children during the  
9 pandemic.  
10  
11  
12  
13  
14

### 15 **Sub-theme 1: A lack of family-centred conversations during the pandemic**

16  
17 Of 105 responders, 68.5% (n = 72) of HSCPs reported that the healthcare team  
18 'probably' or 'definitely' asked relatives if the dying patient had important relationships with  
19 children. This contrasts with reports from 108 bereaved relatives, of which only 10% (n = 11)  
20 reported that HSCPs asked if the dying family member had important relationships with  
21 children.  
22  
23  
24  
25  
26  
27

28 Often, relatives perceived that healthcare teams were 'too busy' during the pandemic to  
29 provide family centred support. Some relatives felt professionals would not have thought to  
30 ask if the dying patient had important relationships with children, as they were not of a typical  
31 age to have dependent children.  
32  
33  
34  
35

36 *"Nobody asked me if I had children. I suppose they didn't think to ask as my mother*  
37 *was 92 and I'm 67. It's not something that I directly needed, but for my son that would have*  
38 *helped him and my daughter in-law. But at the same time, I don't think the NHS staff had time*  
39 *for these things' [Bereaved relative; adult child of the deceased; hospital-based death; first*  
40 *interview]*  
41  
42  
43  
44  
45

46 HSCPs described increased pressures during the pandemic such as reduced staffing  
47 levels from sickness and increased workloads. Consequently, care was centred on clinical  
48 elements such as pain and symptom management. However, most professionals reflected that  
49 these obstacles to family centred conversations pre-dated the pandemic. On occasions, HSCPs  
50 felt the pandemic meant there was 'less of a need to prioritise conversations about the children'  
51 with relatives, as they perceived it would have been 'easier' for parents to talk to their children  
52 about a death due to increased general conversations and media coverage about dying.  
53  
54  
55  
56  
57  
58  
59  
60

1  
2  
3  
4  
5  
6  
7  
8  
9  
10  
11  
12  
13  
14  
15  
16  
17  
18  
19  
20  
21  
22  
23  
24  
25  
26  
27  
28  
29  
30  
31  
32  
33  
34  
35  
36  
37  
38  
39  
40  
41  
42  
43  
44  
45  
46  
47  
48  
49  
50  
51  
52  
53  
54  
55  
56  
57  
58  
59  
60

*“It’s not really my role. And I’m not sure that that ever, if I’m honest is ever, that’s not really been part of what I do. It’s probably easier now with all that’s been going on over the last year.” [HSCP; palliative care registered nurse; care-home based; first interview]*

## **Sub-theme 2: Psychosocial support provided to families with children during the pandemic**

Respondents were asked to assess the overall level of support given by the healthcare team to relatives or friends about talking to children about a patient’s illness. Of the 65 HSCPs, 32.3% (n = 21) felt the level of support provided to relatives by healthcare teams regarding talking to children about the patient’s impending death was ‘excellent/good’, while 52.3% (n = 34) reported ‘I don’t know’ to the same question. This contrasted with the responses from 75 bereaved relatives; 51.9% (n = 39) ‘disagreed/strongly disagreed’ that they had received enough support from HSCPs about talking to children about the impending death. Only 17.3% (n = 13) of bereaved relatives agreed/strongly agreed they had received adequate support from professionals.

Due to restricted visiting to hospital, care home and hospice settings during the pandemic, some of the relatives and HSCPs interviewed reported that families had video calls with their dying family member when their health permitted. From these interviews, it appeared that HSCPs had an instrumental role in encouraging parents to involve children in virtual calls. Some HSCPs believed it was important to include the children in virtual calls so they would feel part of the dying experience and help them understand the death. However, it seemed these virtual connections between dying family members and their relatives rarely happened, and where they did occur, children were only included if they had already been informed of the reality of the situation. Some professionals reflected this as a *‘positive outcome for children in the pandemic’*, as pre-pandemic children were usually not involved when a significant adult was in the final weeks and days of life in hospital and care home settings.

*“We’re really quite keen on involving children as much as possible. But there had to be more thinking outside the box. We had in fact we even managed to facilitate a video between a dying mum and her children on one of our wards you know right at the height of COVID.” [HSCP; palliative care social worker; hospital based; first interview]*

1  
2  
3  
4  
5  
6  
7  
8  
9  
10  
11  
12  
13  
14  
15  
16  
17  
18  
19  
20  
21  
22  
23  
24  
25  
26  
27  
28  
29  
30  
31  
32  
33  
34  
35  
36  
37  
38  
39  
40  
41  
42  
43  
44  
45  
46  
47  
48  
49  
50  
51  
52  
53  
54  
55  
56  
57  
58  
59  
60

Where children were identified in the family, HSCPs often felt they lacked adequate knowledge to provide meaningful support in the ‘*here and now*’ and consequently signposted relatives to the websites of charities that provide family support or advice. Many HSCPs believed psychosocial support to families regarding children was provided by other colleagues, such as social care professionals or registered nurses on the wards or in the community.

*“I didn’t know what else I could have done in that moment. I think [charity name] are quite good with this sort of thing when it comes to illness and children. [HSCP; palliative care clinical nurse specialist; hospital based; first interview]”*

### **Theme 3: How families prepare children for the death of a significant adult**

On occasions, parents reported that the websites to which they had been signposted by HSCPs were no longer available as the charity had ceased operations during the pandemic. Parents frequently reported that online information did not meet the developmental or cognitive needs of their children. Some parents searched the Internet for guidance on how best to share this information with their adolescent children (ages 13+) but felt the information they found online was centred on talking about death with younger children.

*“I was searching the Internet for the words. But anything I came across was all quite childish. It was for young children really. It wasn’t helpful for us to talk to my [teenage child].”*  
*[Bereaved relative; niece of the deceased; care home death; first interview]*

More often, relatives reflected it would have been helpful if they had ‘*someone to talk to*’ about how best to tell their children of the impending death rather than accessing websites. Some relatives attempted to contact services that provide support to family on preparing children for a death. However, many found it challenging as the staff from these organisations were furloughed during the pandemic. A number of relatives reported their loved one had already died by the time a family support worker got in contact with them.

*“I got in touch with [organisation name] and they said the lady working in family support was only working 2 days a week because of the coronavirus, so would get back in touch with me when back in the office on Friday. But mum died on the Thursday, so it was too late”*  
*[Bereaved relative; adult child of the deceased; hospital death; second interview]*

1  
2  
3 While some parents did tell their children the significant adult was going to 'die', others  
4 informed their young children using phrases such as 'grandpa is going heaven soon' or 'granny  
5 is going to the stars soon'. It seemed parents struggled to tell the children when a significant  
6 adult had died, preferring to use euphemisms such as 'passed-away' or 'star in the sky'. Most  
7 relatives reflected it would have been 'easier' for the parents to tell the children of the death if  
8 HSCPs had provided advice and guidance on how to tell children a significant adult was going  
9 to die before this happened.  
10  
11  
12  
13  
14  
15  
16

17 *"I just wanted somebody to tell me how to start the conversation with them [the*  
18 *children] that granny was going to die. That's what was missing. I didn't want or need a perfect*  
19 *script, but some pointers on how to do it would have gone a long way"* [Bereaved relative;  
20 *adult child of the deceased; hospital death; second interview]*  
21  
22  
23  
24  
25

## 26 DISCUSSION

27 There appears to be a striking mismatch between reports from HSCPs and relatives  
28 bereaved during the COVID-19 crisis about whether professionals had asked if patients had  
29 important relationships with children. The majority of participating HSCPs indicated that the  
30 team had 'probably' or 'definitely asked', whereas only 10% of relatives stated this had  
31 occurred. This disparity was also reflected in the HSCPs and families' ratings of the perceived  
32 level of support about talking to children. Most HSCPs in this study were not aware if families  
33 had been offered support, and the majority of relatives stated that they had not been provided  
34 with advice or guidance from professionals in telling children about an anticipated death. These  
35 inconsistencies between HSCPs and relatives may reflect HSCPs' beliefs that the identification  
36 of children and family support falls within the remit of another member of the clinical team,  
37 but in practice this does not occur.<sup>9,10</sup>  
38  
39  
40  
41  
42  
43  
44  
45  
46  
47

48 Many children were not prepared for the death of a significant adult during the  
49 pandemic. Factors impacting this non-disclosure included adults' own lack of understanding  
50 about the declining health and impending death of their loved one, and parental beliefs that not  
51 telling the children someone close to them was going to die was protecting them from distress.  
52 Similar findings have been reported in the literature<sup>1,2,8,16</sup> Psychoeducational resources were  
53 less available to families during the pandemic and were sometimes perceived to be  
54 inappropriate for the child's age. Consequently, many children were not told the truth about  
55  
56  
57  
58  
59  
60



1  
2  
3 their family member's health in their final weeks and days of life; when the death happened,  
4 parents continued to struggle to share this news with their children.  
5  
6  
7

8 Professionals' felt they had insufficient time to engage in meaningful conversations  
9 with families about talking to children about illness and death during the COVID-19 crisis. A  
10 similar finding has been reported in the pre-pandemic literature.<sup>8,9,10</sup> Whilst acknowledging the  
11 multiple demands on HSCPs, particularly during a pandemic, the perceived lack of time for  
12 these conversations could be a form of avoidance, by which staff consciously or unconsciously  
13 protect themselves from this sensitive and emotionally demanding work.<sup>17</sup>  
14  
15  
16  
17  
18  
19

20 Some families were unsure how to tell their children someone in their life was going  
21 to die using age-appropriate language. It seems there are a lack of resources available to aid  
22 HSCPs ability to equip families with the necessary tools to have important conversations about  
23 death and dying with their children.<sup>9</sup> Parents wanted time with HSCPs to discuss the language  
24 they might use with their children to prepare and support them for a bereavement, rather than  
25 relying on written materials or websites.  
26  
27  
28  
29  
30  
31

### 32 **Implications for practice**

33 Despite the perception held by many HSCPs, conversations about death and dying  
34 with children did not seem to be '*easier*' for parents during the COVID-19 pandemic. While  
35 general conversations about death have increased in the last twelve months, the experience  
36 of raising this topic with children may be different when someone in their own family is  
37 nearing end of life.<sup>18</sup> It is important that HSCPs do not make assumptions that families  
38 understand the reality of a relative's declining health or realise how important it is to have  
39 honest conversations with children about illness and death.  
40  
41  
42  
43  
44  
45  
46  
47

48 Bereaved families have reflected it would have been helpful if HSCPs had started a  
49 conversation with them on how best to tell the children someone close to them was going to  
50 die.<sup>2</sup> This would require HSCP to: (1) understand the long-term benefits of effective  
51 communication for children's psychological wellbeing and family functioning; and (2)  
52 identify children within a patient's family and social network. HSCPs should ask their  
53 patients and/or the relatives 'do you have important relationships with children?'. This  
54 question should be universal and not based on a patient's age; while most of the patients in  
55  
56  
57  
58  
59  
60

1  
2  
3  
4  
5  
6  
7  
8  
9  
10  
11  
12  
13  
14  
15  
16  
17  
18  
19  
20  
21  
22  
23  
24  
25  
26  
27  
28  
29  
30  
31  
32  
33  
34  
35  
36  
37  
38  
39  
40  
41  
42  
43  
44  
45  
46  
47  
48  
49  
50  
51  
52  
53  
54  
55  
56  
57  
58  
59  
60

this study were later in life, the number of relationships an adult has with children is likely to increase with each successive generation. Additionally, the proportion of grandparents who provide formal or informal children for working parents means this population are significantly involved in the lives of children.<sup>19</sup> Crucially when relationships with children are identified, HSCPs must have the training and resources needed to follow up with adults about *why* talking to children matters and *how* these conversations can be initiated with children of all ages.

### Strengths and limitations of the study

This is the first known study that has included quantitative measures about family-centred conversations in end of life care. Findings are limited to an ethnically homogenous White population; future studies should investigate the experiences of preparing children for death from ethnic minority populations.

### Conclusion

There was a pronounced difference between bereaved relatives' and HSCPs' perceptions about identifying children affected by the anticipated death of an important adult during the COVID-19 pandemic. HSCPs have an important role in supporting families to initiate conversations with children about end of life in a timely and developmentally-sensitive manner. This is essential for the long-term psychological wellbeing of bereaved families and children.

### ACKNOWLEDGEMENTS

The authors would like to express our sincere thanks and gratitude to the relatives and professionals that participated in this study. We extend our thanks to Rosemary Hughes and Tamsin McGlinchey for conducting the interviews.

### FUNDING

The author(s) disclosed receipt of the following financial support for the research, authorship, and/or publication of this article:

There was no direct funding award for conducting this study. Data analysis and manuscript preparation was supported by funding from the Westminster Foundation awarded to University of Oxford.

## DATA AVAILABILITY STATEMENT

The data that supports the findings of this study are available at the University of Oxford, University of Liverpool, and University of Sheffield's repositories and available on request from the first and last authors. The data are not publicly available due to privacy and ethical restrictions.

## ETHICAL STATEMENT

The study passed ethical committee review from University of Liverpool [Ref: 7761].

## CONFLICT OF INTEREST

The author(s) declared no potential conflicts of interest with respect to the research, authorship, and/or publication of this article.

## PATIENT CONSENT FOR PUBLICATION

Not required

## AUTHOR CONTRIBUTIONS

All authors were involved in the design of this study, survey dissemination and data collection. First interviews were conducted by two female researchers at the University of Liverpool. Second interviews were conducted by JRH. JRH analysed and interpreted the data. JRH, ER, LJD drafted the manuscript. All authors critically reviewed the manuscript. JRH took responsibility for the submission process.

## References

[1] Hanna JR, McCaughan E, Semple CJ. Challenges and support needs of parents and children when a parent is at end of life: a systematic review. *Palliative medicine*. 2019 Sep;33(8):1017-44.  
<https://doi.org/10.1177/0269216319857622>

[2] Semple CJ, McCaughan E, Beck ER, Hanna JR. 'Living in parallel worlds'—bereaved parents' experience of family life when a parent with dependent children is at end of life from cancer: A qualitative study. *Palliative Medicine*. 2021 Mar 26:02692163211001719.  
<https://doi.org/10.1177/02692163211001719>

- [3] Marshall S, Fearnley R, Bristowe K, Harding R. The perspectives of children and young people affected by parental life-limiting illness: An integrative review and thematic synthesis. *Palliative Medicine*. 2020 Nov 19;0269216320967590. <https://doi.org/10.1177/0269216320967590>
- [4] Dalton L, Rapa E, Ziebland S, Rochat T, Kelly B, Hanington L, Bland R, Yousafzai A, Stein A, Betancourt T, Bluebond-Langner M. Communication with children and adolescents about the diagnosis of a life-threatening condition in their parent. *The Lancet*. 2019 Mar 16;393(10176):1164-76. [https://doi.org/10.1016/S0140-6736\(18\)33201-X](https://doi.org/10.1016/S0140-6736(18)33201-X)
- [5] Ellis J, Dowrick C, Lloyd-Williams M. The long-term impact of early parental death: lessons from a narrative study. *Journal of the Royal Society of Medicine*. 2013 Feb;106(2):57-67. <https://doi.org/10.1177/0141076812472623>
- [6] Fearnley R, Boland JW. Communication and support from health-care professionals to families, with dependent children, following the diagnosis of parental life-limiting illness: a systematic review. *Palliative medicine*. 2017 Mar;31(3):212-22. <https://doi.org/10.1177/0269216316655736>
- [7] McCaughan E, Semple CJ, Hanna JR. 'Don't forget the children': A qualitative study when a parent of dependent children is at end of life from cancer. *Journal of Supportive Cancer Care*
- [8] Dalton LJ, McNivan A, Hanna JR, Stein A, Rapa E. Family centred communication when an adult patient is diagnosed with a life-threatening condition. *Patient education and counselling*.
- [9] Hanna JR, McCaughan E, Beck ER, Semple CJ. Providing care to parents dying from cancer with dependent children: Health and social care professionals' experience. *Psycho-Oncology*. 2021 Mar;30(3):331-9. <https://doi.org/10.1002/pon.5581>
- [10] Franklin P, Arber A, Reed L, Ream E. Health and social care professionals' experiences of supporting parents and their dependent children during, and following, the death of a parent: a qualitative review and thematic synthesis. *Palliative medicine*. 2019 Jan;33(1):49-65. <https://doi.org/10.1177/0269216318803494>
- [11] Hanna JR, Rapa E, Dalton LJ, Hughes R, McGlinchey T, Bennett KM, Donnellan WJ, Mason SR, Mayland CR. A qualitative study of bereaved relatives' end of life experiences during the COVID-19 pandemic. *Palliative Medicine*. 2021 Mar 30;02692163211004210. <https://doi.org/10.1177/02692163211004210>

[12] Hanna JR, Rapa E, Dalton LJ, Hughes R, Quarmby LM, McGlinchey T, Donnellan WJ, Bennett KM, Mayland CR, Mason SR. Health and social care professionals' experiences of providing end of life care during the COVID-19 pandemic. *Palliative Medicine*. 2021. May

[13] Creswell JW, Tashakkori A. Developing publishable mixed methods manuscripts. <https://doi.org/10.1177/1558689806298644>

[14] Braun V, Clarke V. Reflecting on reflexive thematic analysis. *Qualitative Research in Sport, Exercise and Health*. 2019 Aug 8;11(4):589-97.

[15] Walshe C. Mixed method research in palliative care. In: MacLeod R, Van den Block L (Eds). *Textbook of Palliative Care*. Springer, Cham. [https://doi.org/10.1007/978-3-319-77740-5\\_109](https://doi.org/10.1007/978-3-319-77740-5_109).

[16] Kennedy VL, Lloyd-Williams M. Information and communication when a parent has advanced cancer. *Journal of affective disorders*. 2009 Apr 1;114(1-3):149-55. <https://doi.org/10.1016/j.jad.2008.06.022>

[17] Geerse OP, Lamas DJ, Sanders JJ, Paladino J, Kavanagh J, Henrich NJ, Berendsen AJ, Hiltermann TJ, Fromme EK, Bernacki RE, Block SD. A qualitative study of serious illness conversations in patients with advanced cancer. *Journal of palliative medicine*. 2019 Jul 1;22(7):773-81. <https://doi.org/10.1089/jpm.2018.0487>

[18] Caughlin JP, Mikucki-Enyart SL, Middleton AV, Stone AM, Brown LE. Being open without talking about it: A rhetorical/normative approach to understanding topic avoidance in families after a lung cancer diagnosis. *Communication Monographs*. 2011 Dec 1;78(4):409-36. <https://doi.org/10.1080/03637751.2011.618141>

[19] Buchanan A, Rotkirch A. Twenty-first century grandparents: global perspectives on changing roles and consequences.

**Table 1: Semi-structured topic guide used to guide the conduct of the study**

**Initial topics based on the literature and study aims and objectives**

- Exploration of end of life experiences during the COVID-19 pandemic.
- Exploration of how relatives managed the final weeks and days of life with their dependent children.
- Exploration of the needs of families as they prepared children for a death during the COVID-19 pandemic.

- Exploration of professionals’ perceptions of the needs of families as they prepared children for death during the COVID-19 pandemic.
  - Exploration of professionals’ perceptions of the psychosocial needs of families when a relative was dying during the pandemic in relation to their children.
- Sample of additional topics for follow-up interviews**
- Professionals’ role in providing psychological support to families at end of life about important relationships with dependent children.
  - Professionals’ role in signposting families to family support services during the COVID-19 pandemic.
  - Families’ engagement with family support services when a relative was at end of life during the COVID-19 pandemic.
  - Children’s involvement in the family when a relative was at end of life during the COVID-19 pandemic.

**Table 2: Characteristics of the bereaved relatives and HSCPs interviewed in the study recruited to the study**

| <b>Characteristics of HSCPs interviewed</b> | <i>N</i> | <b>Characteristics of bereaved relatives interviewed</b> | <i>N</i>                     |    |
|---------------------------------------------|----------|----------------------------------------------------------|------------------------------|----|
| <b>Hospital based professionals</b>         |          | <b>Gender</b>                                            |                              |    |
| Palliative care social worker               | 1        | Female                                                   | 12                           |    |
| Palliative care consultant                  | 1        | Male                                                     | 7                            |    |
| Palliative care clinical nurse specialist   | 2        | <b>Relationship to the family member</b>                 |                              |    |
| Palliative care team leader (nurse)         | 1        |                                                          | Spouse/partner               | 4  |
| Registered nurse                            | 1        |                                                          | Adult child                  | 11 |
| Healthcare chaplain                         | 1        |                                                          | Adult grandchild             | 1  |
| Healthcare assistant                        | 1        |                                                          | Son/daughter in-law          | 2  |
| Junior doctor                               | 2        |                                                          | Niece                        | 1  |
| <b>Care home based professionals</b>        |          | <b>Ethnicity of relative/deceased</b>                    |                              |    |
| Registered nurse                            | 2        |                                                          | White                        | 19 |
| Palliative care registered nurse            | 1        | (English/Welsh/Scottish/Northern Irish/British)          |                              |    |
| <b>Hospice based professionals</b>          |          | <b>Location of relative/death</b>                        |                              |    |
| Palliative care clinical nurse specialist   | 1        |                                                          | England                      | 14 |
| Palliative care consultant                  | 1        |                                                          | Scotland                     | 4  |
| Palliative care nurse                       | 1        | Wales                                                    | 1                            |    |
| <b>Location</b>                             |          | Northern Ireland                                         | 0                            |    |
|                                             | England  |                                                          |                              |    |
|                                             | Scotland |                                                          |                              |    |
|                                             | Wales    |                                                          |                              |    |
| N. Ireland                                  | 1        | <b>Place of death</b>                                    |                              |    |
| <b>Gender</b>                               |          |                                                          | Hospital                     | 10 |
|                                             | Female   |                                                          | General ward ( <i>n</i> = 3) |    |
|                                             | Male     | Intensive care unit ( <i>n</i> = 4)                      |                              |    |
|                                             | 11       | Coronavirus ward ( <i>n</i> = 3)                         |                              |    |
|                                             | 5        |                                                          |                              |    |

|    |                                  |           |                                                    |
|----|----------------------------------|-----------|----------------------------------------------------|
| 1  |                                  |           |                                                    |
| 2  |                                  |           |                                                    |
| 3  |                                  |           |                                                    |
| 4  |                                  | Care home | 9                                                  |
| 5  | <b>Ethnicity</b>                 |           |                                                    |
| 6  | White                            | 16        | <b>Chronic condition of deceased family member</b> |
| 7  | (English/Welsh/Scottish/Northern |           | Dementia                                           |
| 8  | Irish/British)                   |           | 8                                                  |
| 9  |                                  |           | Cancer                                             |
| 10 |                                  |           | 4                                                  |
| 11 |                                  |           | Heart failure                                      |
| 12 |                                  |           | 3                                                  |
| 13 |                                  |           | COPD                                               |
| 14 |                                  |           | 2                                                  |
| 15 |                                  |           | Renal disease                                      |
| 16 |                                  |           | 1                                                  |
| 17 |                                  |           | None identified                                    |
| 18 |                                  |           | 1                                                  |
| 19 |                                  |           | <b>Age of relative</b>                             |
| 20 |                                  |           | 20 – 29                                            |
| 21 |                                  |           | 1                                                  |
| 22 |                                  |           | 30 – 39                                            |
| 23 |                                  |           | 2                                                  |
| 24 |                                  |           | 40 – 49                                            |
| 25 |                                  |           | 1                                                  |
| 26 |                                  |           | 50 – 59                                            |
| 27 |                                  |           | 8                                                  |
| 28 |                                  |           | 60 – 69                                            |
| 29 |                                  |           | 6                                                  |
| 30 |                                  |           | 70 – 79                                            |
| 31 |                                  |           | 1                                                  |
| 32 |                                  |           | <b>Age of dying family member</b>                  |
| 33 |                                  |           | 50 – 59                                            |
| 34 |                                  |           | 1                                                  |
| 35 |                                  |           | 60 – 69                                            |
| 36 |                                  |           | 2                                                  |
| 37 |                                  |           | 70 – 79                                            |
| 38 |                                  |           | 2                                                  |
| 39 |                                  |           | 80 – 89                                            |
| 40 |                                  |           | 9                                                  |
| 41 |                                  |           | 90+                                                |
| 42 |                                  |           | 3                                                  |
| 43 |                                  |           |                                                    |
| 44 |                                  |           |                                                    |
| 45 |                                  |           |                                                    |
| 46 |                                  |           |                                                    |
| 47 |                                  |           |                                                    |
| 48 |                                  |           |                                                    |
| 49 |                                  |           |                                                    |
| 50 |                                  |           |                                                    |
| 51 |                                  |           |                                                    |
| 52 |                                  |           |                                                    |
| 53 |                                  |           |                                                    |
| 54 |                                  |           |                                                    |
| 55 |                                  |           |                                                    |
| 56 |                                  |           |                                                    |
| 57 |                                  |           |                                                    |
| 58 |                                  |           |                                                    |
| 59 |                                  |           |                                                    |
| 60 |                                  |           |                                                    |

1  
2  
3 **Supplementary file**  
4  
5

6 **Family-centred questions included in the survey for bereaved relatives.**  
7

8 **1. Did anyone in the healthcare team ask if your relative/friend had any important**  
9 **relationships with children (age 0 – 25 years)?**  
10

11 Yes / No  
12

13  
14  
15 **2. I was given enough help and support by the healthcare team to talk to children about**  
16 **my relative/friend's illness?**  
17

18 Strongly agree / Agree / Neither agree nor disagree / Disagree / Strongly disagree  
19  
20

21  
22 **Family-centred questions included in the survey for HSCPs.**  
23

24  
25  
26 **1. Did the healthcare team ask whether the patient had important relationships with**  
27 **children or young adults (age 0 –25 years)?**  
28

29 Yes, definitely / Yes, probably / No, probably not / No, definitely not / I don't know  
30  
31

32  
33 **2. How would you assess the overall level of support given by the healthcare team to**  
34 **relatives/friends about talking to children about a patient's illness?**  
35

36 Excellent / Good / Fair/ Poor / I don't know  
37  
38  
39  
40  
41  
42  
43  
44  
45  
46  
47  
48  
49  
50  
51  
52  
53  
54  
55  
56  
57  
58  
59  
60



## STROBE Statement—checklist of items that should be included in reports of observational studies

|                              | Item No | Recommendation                                                                                                                                                                                                                                                                                                                                                                                                                                                         | Page No |
|------------------------------|---------|------------------------------------------------------------------------------------------------------------------------------------------------------------------------------------------------------------------------------------------------------------------------------------------------------------------------------------------------------------------------------------------------------------------------------------------------------------------------|---------|
| <b>Title and abstract</b>    | 1       | (a) Indicate the study's design with a commonly used term in the title or the abstract                                                                                                                                                                                                                                                                                                                                                                                 | 1       |
|                              |         | (b) Provide in the abstract an informative and balanced summary of what was done and what was found                                                                                                                                                                                                                                                                                                                                                                    | 3       |
| <b>Introduction</b>          |         |                                                                                                                                                                                                                                                                                                                                                                                                                                                                        |         |
| Background/rationale         | 2       | Explain the scientific background and rationale for the investigation being reported                                                                                                                                                                                                                                                                                                                                                                                   | 4       |
| Objectives                   | 3       | State specific objectives, including any prespecified hypotheses                                                                                                                                                                                                                                                                                                                                                                                                       | 4       |
| <b>Methods</b>               |         |                                                                                                                                                                                                                                                                                                                                                                                                                                                                        |         |
| Study design                 | 4       | Present key elements of study design early in the paper                                                                                                                                                                                                                                                                                                                                                                                                                | 4/5     |
| Setting                      | 5       | Describe the setting, locations, and relevant dates, including periods of recruitment, exposure, follow-up, and data collection                                                                                                                                                                                                                                                                                                                                        | 5       |
| Participants                 | 6       | (a) <i>Cohort study</i> —Give the eligibility criteria, and the sources and methods of selection of participants. Describe methods of follow-up<br><i>Case-control study</i> —Give the eligibility criteria, and the sources and methods of case ascertainment and control selection. Give the rationale for the choice of cases and controls<br><i>Cross-sectional study</i> —Give the eligibility criteria, and the sources and methods of selection of participants | 5       |
|                              |         | (b) <i>Cohort study</i> —For matched studies, give matching criteria and number of exposed and unexposed<br><i>Case-control study</i> —For matched studies, give matching criteria and the number of controls per case                                                                                                                                                                                                                                                 |         |
| Variables                    | 7       | Clearly define all outcomes, exposures, predictors, potential confounders, and effect modifiers. Give diagnostic criteria, if applicable                                                                                                                                                                                                                                                                                                                               | 5/6     |
| Data sources/<br>measurement | 8*      | For each variable of interest, give sources of data and details of methods of assessment (measurement). Describe comparability of assessment methods if there is more than one group                                                                                                                                                                                                                                                                                   |         |
| Bias                         | 9       | Describe any efforts to address potential sources of bias                                                                                                                                                                                                                                                                                                                                                                                                              | n/a     |
| Study size                   | 10      | Explain how the study size was arrived at                                                                                                                                                                                                                                                                                                                                                                                                                              | n/a     |
| Quantitative variables       | 11      | Explain how quantitative variables were handled in the analyses. If applicable, describe which groupings were chosen and why                                                                                                                                                                                                                                                                                                                                           | 6       |
| Statistical methods          | 12      | (a) Describe all statistical methods, including those used to control for confounding                                                                                                                                                                                                                                                                                                                                                                                  | 6       |
|                              |         | (b) Describe any methods used to examine subgroups and interactions                                                                                                                                                                                                                                                                                                                                                                                                    | n/a     |
|                              |         | (c) Explain how missing data were addressed                                                                                                                                                                                                                                                                                                                                                                                                                            | n/a     |
|                              |         | (d) <i>Cohort study</i> —If applicable, explain how loss to follow-up was addressed<br><i>Case-control study</i> —If applicable, explain how matching of cases and controls was addressed<br><i>Cross-sectional study</i> —If applicable, describe analytical methods taking account of sampling strategy                                                                                                                                                              | n/a     |
|                              |         | (e) Describe any sensitivity analyses                                                                                                                                                                                                                                                                                                                                                                                                                                  |         |

Continued on next page

| <b>Results</b>           |     |                                                                                                                                                                                                              |       |
|--------------------------|-----|--------------------------------------------------------------------------------------------------------------------------------------------------------------------------------------------------------------|-------|
| Participants             | 13* | (a) Report numbers of individuals at each stage of study—eg numbers potentially eligible, examined for eligibility, confirmed eligible, included in the study, completing follow-up, and analysed            | 7     |
|                          |     | (b) Give reasons for non-participation at each stage                                                                                                                                                         | 7     |
|                          |     | (c) Consider use of a flow diagram                                                                                                                                                                           | n/a   |
| Descriptive data         | 14* | (a) Give characteristics of study participants (eg demographic, clinical, social) and information on exposures and potential confounders                                                                     | 7     |
|                          |     | (b) Indicate number of participants with missing data for each variable of interest                                                                                                                          | 7     |
|                          |     | (c) <i>Cohort study</i> —Summarise follow-up time (eg, average and total amount)                                                                                                                             | na    |
| Outcome data             | 15* | <i>Cohort study</i> —Report numbers of outcome events or summary measures over time                                                                                                                          | na    |
|                          |     | <i>Case-control study</i> —Report numbers in each exposure category, or summary measures of exposure                                                                                                         | na    |
|                          |     | <i>Cross-sectional study</i> —Report numbers of outcome events or summary measures                                                                                                                           | na    |
| Main results             | 16  | (a) Give unadjusted estimates and, if applicable, confounder-adjusted estimates and their precision (eg, 95% confidence interval). Make clear which confounders were adjusted for and why they were included | 7-13  |
|                          |     | (b) Report category boundaries when continuous variables were categorized                                                                                                                                    | na    |
|                          |     | (c) If relevant, consider translating estimates of relative risk into absolute risk for a meaningful time period                                                                                             | na    |
| Other analyses           | 17  | Report other analyses done—eg analyses of subgroups and interactions, and sensitivity analyses                                                                                                               | 7-13  |
| <b>Discussion</b>        |     |                                                                                                                                                                                                              |       |
| Key results              | 18  | Summarise key results with reference to study objectives                                                                                                                                                     | 13-15 |
| Limitations              | 19  | Discuss limitations of the study, taking into account sources of potential bias or imprecision. Discuss both direction and magnitude of any potential bias                                                   | 15    |
| Interpretation           | 20  | Give a cautious overall interpretation of results considering objectives, limitations, multiplicity of analyses, results from similar studies, and other relevant evidence                                   | 14-15 |
| Generalisability         | 21  | Discuss the generalisability (external validity) of the study results                                                                                                                                        | 14-15 |
| <b>Other information</b> |     |                                                                                                                                                                                                              |       |
| Funding                  | 22  | Give the source of funding and the role of the funders for the present study and, if applicable, for the original study on which the present article is based                                                | 15    |

\*Give information separately for cases and controls in case-control studies and, if applicable, for exposed and unexposed groups in cohort and cross-sectional studies.

**Note:** An Explanation and Elaboration article discusses each checklist item and gives methodological background and published examples of transparent reporting. The STROBE checklist is best used in conjunction with this article (freely available on the Web sites of PLoS Medicine at <http://www.plosmedicine.org/>, Annals of Internal Medicine at <http://www.annals.org/>, and Epidemiology at <http://www.epidem.com/>). Information on the STROBE Initiative is available at [www.strobe-statement.org](http://www.strobe-statement.org).

# BMJ Open

## Experiences of preparing children for a death of an important adult during the COVID-19 pandemic: A mixed methods study

|                                 |                                                                                                                                                                                                                                                                                                                                                                                                                                                                                                 |
|---------------------------------|-------------------------------------------------------------------------------------------------------------------------------------------------------------------------------------------------------------------------------------------------------------------------------------------------------------------------------------------------------------------------------------------------------------------------------------------------------------------------------------------------|
| Journal:                        | <i>BMJ Open</i>                                                                                                                                                                                                                                                                                                                                                                                                                                                                                 |
| Manuscript ID                   | bmjopen-2021-053099.R1                                                                                                                                                                                                                                                                                                                                                                                                                                                                          |
| Article Type:                   | Original research                                                                                                                                                                                                                                                                                                                                                                                                                                                                               |
| Date Submitted by the Author:   | 12-Jul-2021                                                                                                                                                                                                                                                                                                                                                                                                                                                                                     |
| Complete List of Authors:       | Rapa, Elizabeth; Oxford University, Department of Psychiatry<br>Hanna, Jeffrey; Oxford University, Department of Psychiatry<br>Mayland, C; The University of Sheffield, Department of Oncology and Metabolism; University of Liverpool, Palliative Care Institute Liverpool<br>Mason, Stephen; University of Liverpool, Palliative Care Institute Liverpool<br>Moltrecht, Bettina; Oxford University, Department of Psychiatry<br>Dalton, Louise J; Oxford University, Department of Psychiatry |
| <b>Primary Subject Heading</b>: | Palliative care                                                                                                                                                                                                                                                                                                                                                                                                                                                                                 |
| Secondary Subject Heading:      | Palliative care                                                                                                                                                                                                                                                                                                                                                                                                                                                                                 |
| Keywords:                       | COVID-19, PALLIATIVE CARE, Adult palliative care < PALLIATIVE CARE                                                                                                                                                                                                                                                                                                                                                                                                                              |
|                                 |                                                                                                                                                                                                                                                                                                                                                                                                                                                                                                 |

SCHOLARONE™  
Manuscripts



I, the Submitting Author has the right to grant and does grant on behalf of all authors of the Work (as defined in the below author licence), an exclusive licence and/or a non-exclusive licence for contributions from authors who are: i) UK Crown employees; ii) where BMJ has agreed a CC-BY licence shall apply, and/or iii) in accordance with the terms applicable for US Federal Government officers or employees acting as part of their official duties; on a worldwide, perpetual, irrevocable, royalty-free basis to BMJ Publishing Group Ltd ("BMJ") its licensees and where the relevant Journal is co-owned by BMJ to the co-owners of the Journal, to publish the Work in this journal and any other BMJ products and to exploit all rights, as set out in our [licence](#).

The Submitting Author accepts and understands that any supply made under these terms is made by BMJ to the Submitting Author unless you are acting as an employee on behalf of your employer or a postgraduate student of an affiliated institution which is paying any applicable article publishing charge ("APC") for Open Access articles. Where the Submitting Author wishes to make the Work available on an Open Access basis (and intends to pay the relevant APC), the terms of reuse of such Open Access shall be governed by a Creative Commons licence – details of these licences and which [Creative Commons](#) licence will apply to this Work are set out in our licence referred to above.

Other than as permitted in any relevant BMJ Author's Self Archiving Policies, I confirm this Work has not been accepted for publication elsewhere, is not being considered for publication elsewhere and does not duplicate material already published. I confirm all authors consent to publication of this Work and authorise the granting of this licence.

# Experiences of preparing children for a death of an important adult during the COVID-19 pandemic: A mixed methods study

Elizabeth Rapa,<sup>1</sup> $\alpha$

Jeffrey R. Hanna,<sup>1</sup> $\alpha$ \*

Catriona R. Mayland,<sup>2,3</sup>

Stephen R. Mason,<sup>2</sup>

Bettina Moltrecht,<sup>1</sup>

&

Louise J Dalton<sup>1</sup>

\* indicates corresponding and senior author [jeffrey.hanna@psych.ox.ac.uk](mailto:jeffrey.hanna@psych.ox.ac.uk)

$\alpha$  indicates joint first authors for this manuscript

**1. Department of Psychiatry, University of Oxford, Warneford Hospital, Oxford, OX3 7JX**

2. Palliative Care Institute Liverpool, University of Liverpool, North West Cancer Research Centre, 200 London Road, Liverpool, L3 9TA

3. Department of Oncology and Metabolism, University of Sheffield, 2<sup>nd</sup> Floor Broomcross Building, Weston Park Hospital, Whitham Road, Sheffield, S10 2SJ

Dr. Elizabeth Rapa <https://orcid.org/0000-0001-8818-8148>

Dr. Jeffrey R. Hanna <https://orcid.org/0000-0002-8218-5939>

Dr. Stephen R. Mason <https://orcid.org/0000-0002-4020-6869>

Dr. Catriona R. Mayland <https://orcid.org/0000-0002-1440-9953>

Dr. Bettina Moltrecht <http://orcid.org/0000-0002-1838-428X>

Dr. Louise J. Dalton <https://orcid.org/0000-0003-1923-5769>

## ABSTRACT

**Objective:** The objectives of this study were to investigate how families prepared children for the death of a significant adult, and how health and social care professionals provided psychosocial support to families about a relative's death during the COVID-19 pandemic.

**Design/Setting:** A mixed-methods design; an observational survey with health and social care professionals and relatives bereaved during the COVID-19 pandemic in the United Kingdom, and in-depth interviews with bereaved relatives and professionals were conducted. Data were analysed thematically.

**Participants:** Total of 623 participants completed the survey and interviews were conducted with 19 bereaved relatives and 16 professionals.

**Results:** Many children were not prepared for a death of an important adult during the pandemic. Obstacles to preparing children included families' lack of understanding about their relative's declining health; parental beliefs that not telling children was protecting them from upset; and parents' uncertainty about how best to prepare their children for the death. Only 10.2% of relatives reported professionals asked them about their deceased relative's relationships with children. This contrasts with 68.5% of professionals who reported that the healthcare team asked about patient's relationships with children. Professionals did not provide families with psychosocial support to facilitate preparation, and resources were less available or inappropriate for families during the pandemic. Three themes were identified: (1) obstacles to telling children a significant adult is going to die, (2) professionals' role in helping families to prepare children for the death of a significant adult during the pandemic, and (3) how families prepare children for the death of a significant adult.

**Conclusions:** Professionals need to: provide clear and honest communication about a poor prognosis; start a conversation with families about the dying patient's significant relationships with children; and reassure families that telling children someone close to them is dying is beneficial for their longer-term psychological adjustment.

**KEYWORDS:** end of life, COVID-19, communication, children, family, health professionals, social care professionals, psychosocial support

### Strengths and limitations of the study

- First known study that has included quantitative measures about family-centred conversations in end of life care.

- To promote study rigour, second interviews were conducted with some participants to provide clarity on their end of life experiences during the pandemic.
- Findings are limited to an ethnically homogenous White population.

## BACKGROUND

Families are often unsure how best to prepare children (<18 years old) for the death of someone involved in their lives.<sup>1</sup> Literature reports that even when a death is expected the reality of a family member's poor prognosis is not fully shared with children.<sup>2,3</sup> Clear and honest communication with children about the declining health and impending death of a significant adult can promote psychosocial adjustment for children, including better mental and physical health outcomes and fewer referrals to psychiatric services.<sup>4,5</sup>

Parents within family groups have reported a desire and need for advice and guidance from health and social care professionals (HSCPs) about how, when, and what they should tell children regarding an impending death.<sup>1,2,6</sup> Despite the unique positioning of clinical services, families have highlighted a lack of supportive care from HSCPs about how to prepare and support children for a significant death.<sup>2,7</sup> HSCPs have reported family-centred conversations as an emotionally challenging aspect of their clinical role, often perceiving this to be the role of other healthcare colleagues<sup>8,9,10</sup>

Provision of family-centred care in clinical practice is likely to have been affected by the COVID-19 pandemic in the United Kingdom, including the increased practical and emotional pressures encountered by HSCPs<sup>11,12</sup>, and the absence of families visiting in hospital, care home and hospice settings. Exploration of bereaved relatives' and HSCPs' experiences and perceptions will aid our understanding of how families navigated preparing children for a death during the COVID-19 crisis. This will help inform current and future clinical practice on how families can be better supported as they prepare children for a bereavement.

### Aims and objectives

The aim of this study was to explore how families prepared children for a death during the COVID-19 pandemic in the United Kingdom. The objectives were to investigate:

- (1) how families navigated telling children someone close to them was going to die, and
- (2) professionals' role in supporting families as they prepared children for a death.

## METHODS

### Design and context

A mixed-methods design was used for this study<sup>13</sup>; (1) relatives bereaved during the pandemic and HSCPs who provided end of life care during the same period completed an observational, open online survey, and (2) survey respondents who expressed an interest to provide further information were invited, via email, and participated in an in-depth qualitative interview regarding their experiences.

This study was embedded within a national quantitative United Kingdom survey which aimed to: (1) explore the experiences of bereaved relatives regarding end of life care during the COVID-19 pandemic, (2) understand the impact of COVID-19 on the bereavement process for relatives, and (3) explore the experiences of HSCPs who provided end of life care during the COVID-19 crisis. Other findings from this research have been published elsewhere.<sup>11,12,14</sup>

### Patient and public involvement

Five members from the online advisory panel of the Clinical Research and Innovation Office at Sheffield Teaching Hospitals NHS Trust, and the lead PPI representative from the Clinical Cancer Trials Executive Committee provided input to survey development. PPI involvement was helpful for ensuring the language/questioning was appropriate, and resulted in revisions, such as the inclusion of additional response criteria, such as adding 'don't know'.

### Participants

#### *Bereaved relatives*

Participants were considered eligible to complete the survey if they were  $\geq 18$  years old, experienced the death of a family member or close friend during the first wave of the COVID-19 pandemic (March – June 2020), and resided in the United Kingdom. There were no inclusion or exclusion criteria to the cause of the death. Of the 48 respondents that expressed an interest to be involved in follow-up research, a total of 19 relatives were interviewed; 28 potential participants did not respond to the interview invitation, and one declined.

#### *HSCPs*

HSCPs were considered eligible to take part in the survey if they provided end of life care during the first wave (March – June 2020) of the COVID-19 pandemic in the United



1  
2  
3 Kingdom. For simplicity, the term ‘HSCP’ is used as a collective term to describe the range of  
4 professionals and individuals involved in end of life care and support. Seventy-eight  
5 respondents expressed an interest to be involved in follow up research. Of these, 16 took part  
6 in a qualitative interview; 60 did not respond to the invitation, and two replied stating they were  
7 no longer interested.  
8  
9

### 10 11 12 13 **Data collection**

14  
15 An online survey was developed using the Qualtrics platform. Initially, respondents  
16 were asked to select if they were a bereaved friend/relative or a HSCP. The survey included  
17 questions about support for families in relation to preparing children for a death during the  
18 COVID-19 pandemic; questions were developed by the research team and were different for  
19 relatives and professionals (see supplementary file). Appropriate demographic questions were  
20 asked, including age, gender and ethnicity, and relationship to the deceased or clinical role.  
21 The survey was promoted through social media platforms; public and charitable organisations  
22 related to palliative care and bereavement; and organisations of minoritised groups between  
23 June and September 2020.  
24  
25  
26  
27  
28  
29  
30  
31

32  
33 Semi-structured interviews were carried out between July and December 2020. Topic  
34 guides (Table 1) were developed, informed by the literature, the study’s aims and objectives,  
35 and the research team who have a wealth of research and clinical experience in end of life and  
36 bereavement care. Interviews were conducted by two female researchers, neither of whom had  
37 prior relationships with the participants. Interviews were conducted on Zoom (n = 9) or  
38 telephone (n = 26), audio-recorded, and lasted between 20 and 98 minutes.  
39  
40  
41  
42  
43  
44

45  
46 Audio-recordings were transcribed *verbatim* after all interviews were completed and  
47 verified by the research team. Preliminary analysis identified some of the categories developed  
48 from the transcript data required further clarification. Following discussion as a research team  
49 and a protocol/ethical amendment, JRH invited eight participants via email to take part in a  
50 second interview to provide clarity on their experiences. Four bereaved relatives and two  
51 HSCPs agreed to another interview. Two bereaved relatives declined the invitation due to a  
52 lack of interest to take part in further studies. The topic guide was iteratively modified by the  
53 authors who are experienced clinicians and researchers in family-centred care (Table 1).  
54 Second interviews were conducted by JRH (an experienced qualitative researcher) on Zoom,  
55 April 2021, audio-recorded and lasted between 16 and 31 minutes.  
56  
57  
58  
59  
60

## Data analysis

Quantitative data were analysed using descriptive statistics within SPSS v.26 by JRH and BM. The qualitative data was analysed using reflexive thematic analysis.<sup>15</sup> JRH read and reread the transcripts to gain a sense of each participant's story; manually coded the data by marking similar phrases or words from participant's narratives; and identified where some of them constructed into themes, in combination with the quantitative data. This approach was undertaken to enhance and illustrate study findings.<sup>16</sup> ER and LJD independently reviewed the data resulting in the inclusion of one theme and renaming of two sub-themes. Themes were refined through critical dialogue with all authors.

## Ethical considerations

Respondents opted into the study and were provided with written information about the research and provided consent prior to participation. Participants were not forced to answer questions within the survey and each question was optional. Respondents were only contacted to take part in interviews if they expressed an interest to be invited to provide further information. Oral consent was also collected at time of interview. Participants were aware of their right to pause, reschedule or terminate the interview. Data protection procedures were observed, and assurances of confidentiality were provided. Ethical approvals were obtained from University of Liverpool Central University Research Ethics Committee [Ref: 7761].

## RESULTS

### Quantitative survey participants

A total of 278 United Kingdom based bereaved relatives (216 female, 59 male, 3 other) completed the survey. The mean age of respondents was 53.4 years (range 19 – 87 years), and with a single exception, all were from a White British ethnic group. The respondents' relationship with the deceased included son/daughter (n = 174), spouse/partner (n = 22), parent (n = 4), son/daughter in-law (n = 12), niece/nephew (n = 13), grandchild (n = 19), sibling (n = 6), friend (n = 14) and other (n = 14). The age of the deceased ranged from 22 to 103 years (mAvgAge = 81.6 years, SD 12.2). Most of the deaths took place in England (n = 179). Of the 278 bereaved relatives, 110 reported their relative/friend 'definitely' or 'probably' had coronavirus (Table 2). In total, 345 HSCPs completed the survey, which included nurses (n = 155), doctors (n = 114), allied health professionals (n = 28), social care professionals (n = 2),

volunteers (n = 5), and healthcare assistants (n = 23). Eighteen professionals did not provide details about their role. Sample characteristics are reported in Table 3.

### **Qualitative interviews participants**

Overall, nineteen relatives (12 female, 7 male) and sixteen HSCPs (11 female, 5 male) were interviewed. The participant's relationship with their family member varied, including spouse/partner (n = 4); son/daughter in-law (n = 2); adult child (n = 11); grandchild (n = 1); and niece (n = 1). Most relatives (n = 16) reported the deceased had significant relationships with children (<18 years old), including parent (n = 2), grandparent (n = 14), and aunt/uncle (n = 3). The deceased were aged 50 – 59 years (n = 1), 60 – 69 years (n = 3), 70 – 79 years (n = 3), 80 – 89 (n = 9) or 90 years and over (n = 3). A range of HSCPs were involved, including registered nurses (n = 4); clinical nurse specialists (n = 3); team leaders (nurse) (n = 2); medical consultants (n = 2); junior doctors (n = 2), as well as a social worker; chaplain; and healthcare assistant. Additional sample characteristics are reported in Table 4. A summary of the participants involved in the quantitative and qualitative phases of this study are shown in Figure 1.

The data below describes relatives' and HSCPs' experiences and perceptions of the final weeks and days of life. Of the participants interviewed, relatives reported their dying family member was receiving care at a care home (n = 9) or hospital (n = 10) at end of life. Additionally, most relatives interviewed reported their dying family member was living with a chronic illness, and at a point during the pandemic their health condition had rapidly deteriorated; most also tested positive for COVID-19 (n = 13). HSCPs interviewed worked in acute (n = 10) and community (n = 6) settings. Data is discussed under three themes: (1) obstacles to telling the children a significant adult is going to die, (2) HSCPs' role in helping families to prepare children for the death of a significant adult during the pandemic, and (3) how families prepare children for the death of a significant adult.

#### **Theme 1: Obstacles to telling children a significant adult is going to die**

Where a significant adult had a poor prognosis, some relatives and HSCPs reported children had been informed and regularly updated by their parents about the declining health and impending death. In other families, children were reported by relatives and professionals as less prepared for the death. These issues are further discussed under two sub-themes (1)

parental beliefs that not telling children was protecting their children from distress, and (2) the family's lack of understanding about the decline in their loved one's health.

### **Sub-theme 1: Parental beliefs that not telling children was protecting their children from distress**

Relatives and professionals reflected that parents within the family network were unsure how they could tell their children that a significant adult was going to die or what age-appropriate language to use. Additionally, relatives reported that the children's parents were concerned about how children would react to the news. More often, relatives felt it was better *not* to tell the children about the seriousness of the family member's condition, in order to protect them from becoming upset.

*"I don't think they [referring to adult children] mentioned it then through his illness really. They weren't mentioning it on a daily basis or anything. They didn't think it was right to tell them [referring to dependent children] that their granda wasn't going to make it. I just think they didn't want to make them sad at that time" [Bereaved relative; spouse of the deceased; hospital-based death; first interview]*

Although most relatives reported an awareness that their family member's death was expected within weeks or days, it often seemed that the children continued to be less informed of the situation. On occasions, young children (<12 years old) in the family asked their parents to see (physically or virtually) their dying family member. At times, parents told their children 'you can't visit granny because of the virus but you hopefully will see her soon' or 'grandpa is very sick today but maybe tomorrow he will be better, and you can talk to him then'. Relatives and professionals considered this deliberate strategy was an attempt by parents to protect their children from distress.

### **Sub-theme 2: The family's lack of understanding about the decline in their loved one's health**

Some families reported an absence of clear information from HSCPs about their family member's condition at end of life; consequently, adult family members reflected that they themselves were unprepared for the death. On occasions, relatives felt they were provided with 'false hope' regarding their family member's condition when healthcare teams used phrases such as 'there has been no change and your mum is comfortable' or 'things are just the same

1  
2  
3 *and he is doing okay*'. Consequently, relatives stated that parents within the family network  
4 were not aware of the severity of the situation, resulting in parental uncertainty about whether  
5 or how to share this information with their children. Relatives reflected it would have been  
6 helpful if HSCPs had used clear language such as *'dying'* and *'end of life'* when describing the  
7 patient's condition to the family.  
8  
9

10  
11  
12  
13 *"Mum went into the hospital on the Friday around midnight and died on Sunday. I was*  
14 *ringing the hospital every few hours and they just kept saying 'she's still the same and she's*  
15 *comfortable'. We took that as good news that she was doing okay. And that's what we told the*  
16 *girls. That was all we knew, until I got the call on Sunday morning telling me to get to hospital*  
17 *right away as mum only had a few hours to live."* [Bereaved relative; adult children of the  
18 *deceased; hospital death; second interview]*  
19  
20  
21  
22  
23  
24

## 25 **Theme 2: HSCPs' role in helping families to prepare children for a significant death** 26 **during the pandemic** 27 28

29  
30  
31 Professionals provided varying amounts of psychosocial support to families during the  
32 pandemic, but on many occasions specific support in preparing children for a death was not  
33 offered. These issues are discussed under two sub-themes: (1) a lack of family-centred  
34 conversations, and (2) psychosocial support provided to families with children during the  
35 pandemic.  
36  
37  
38  
39

### 40 **Sub-theme 1: A lack of family-centred conversations during the pandemic** 41

42  
43 Of 105 responders, 68.5% (n = 72) of HSCPs reported that the healthcare team  
44 'probably' or 'definitely' asked relatives if the dying patient had important relationships with  
45 children (Table 5). This contrasts with reports from 108 bereaved relatives, of which only  
46 10.2% (n = 11) reported that HSCPs asked if the dying family member had important  
47 relationships with children (Table 6).  
48  
49  
50  
51

52  
53 Often, relatives perceived that healthcare teams were *'too busy'* during the pandemic to  
54 provide family centred support. Some relatives felt professionals would not have thought to  
55 ask if the dying patient had important relationships with children, as they were not of a typical  
56 age to have dependent children.  
57  
58  
59  
60

1  
2  
3  
4  
5  
6  
7  
8  
9  
10  
11  
12  
13  
14  
15  
16  
17  
18  
19  
20  
21  
22  
23  
24  
25  
26  
27  
28  
29  
30  
31  
32  
33  
34  
35  
36  
37  
38  
39  
40  
41  
42  
43  
44  
45  
46  
47  
48  
49  
50  
51  
52  
53  
54  
55  
56  
57  
58  
59  
60

*“Nobody asked me if I had children. I suppose they didn’t think to ask as my mother was 92 and I’m 67. It’s not something that I directly needed, but for my son that would have helped him and my daughter in-law. But at the same time, I don’t think the NHS staff had time for these things’ [Bereaved relative; adult child of the deceased; hospital-based death; first interview]*

HSCPs described increased pressures during the pandemic such as reduced staffing levels from sickness and increased workloads. Consequently, care was centred on clinical elements such as pain and symptom management. However, most professionals reflected that these obstacles to family centred conversations pre-dated the pandemic. On occasions, HSCPs felt the pandemic meant there was ‘less of a need to prioritise conversations about the children’ with relatives, as they perceived it would have been ‘easier’ for parents to talk to their children about a death due to increased general conversations and media coverage about dying.

*“It’s not really my role. And I’m not sure that that ever, if I’m honest is ever, that’s not really been part of what I do. It’s probably easier now with all that’s been going on over the last year.” [HSCP; palliative care registered nurse; care-home based; first interview]*

## **Sub-theme 2: Psychosocial support provided to families with children during the pandemic**

Respondents were asked to assess the overall level of support given by the healthcare team to relatives or friends about talking to children about a patient’s illness. Of the 65 HSCPs, 32.3% (n = 21) felt the level of support provided to relatives by healthcare teams regarding talking to children about the patient’s impending death was ‘excellent/good’, while 52.3% (n = 34) reported ‘I don’t know’ to the same question (Table 7). This contrasted with the responses from 75 bereaved relatives; 52% (n = 39) ‘disagreed/strongly disagreed’ that they had received enough support from HSCPs about talking to children about the impending death. Only 17.3% (n = 13) of bereaved relatives agreed/strongly agreed they had received adequate support from professionals (Table 8).

Due to restricted visiting to hospital, care home and hospice settings during the pandemic, some of the relatives and HSCPs interviewed reported that families had video calls with their dying family member when their health permitted. From these interviews, it appeared that HSCPs had an instrumental role in encouraging parents to involve children in virtual calls.

1  
2  
3 Some HSCPs believed it was important to include the children in virtual calls so they would  
4 feel part of the dying experience and help them understand the death. However, it seemed these  
5 virtual connections between dying family members and their relatives rarely happened, and  
6 where they did occur, children were only included if they had already been informed of the  
7 reality of the situation. Some professionals reflected this as a *'positive outcome for children in*  
8 *the pandemic'*, as pre-pandemic children were usually not involved when a significant adult  
9 was in the final weeks and days of life in hospital and care home settings.

10  
11  
12  
13  
14  
15  
16  
17 *"We're really quite keen on involving children as much as possible. But there had to*  
18 *be more thinking outside the box. We had in fact we even managed to facilitate a video between*  
19 *a dying mum and her children on one of our wards you know right at the height of COVID."*  
20 *[HSCP; palliative care social worker; hospital based; first interview]*

21  
22  
23  
24  
25  
26 Where children were identified in the family, HSCPs often felt they lacked adequate  
27 knowledge to provide meaningful support in the *'here and now'* and consequently signposted  
28 relatives to the websites of charities that provide family support or advice. Many HSCPs  
29 believed psychosocial support to families regarding children was provided by other colleagues,  
30 such as social care professionals or registered nurses on the wards or in the community.

31  
32  
33  
34  
35  
36 *"I didn't know what else I could have done in that moment. I think [charity name] are*  
37 *quite good with this sort of thing when it comes to illness and children. [HSCP; palliative care*  
38 *clinical nurse specialist; hospital based; first interview]*

### 41 42 43 **Theme 3: How families prepare children for the death of a significant adult**

44  
45 On occasions, parents reported that the websites to which they had been signposted by  
46 HSCPs were no longer available as the charity had ceased operations during the pandemic.  
47 Parents frequently reported that online information did not meet the developmental or cognitive  
48 needs of their children. Some parents searched the Internet for guidance on how best to share  
49 this information with their adolescent children (ages 13+) but felt the information they found  
50 online was centred on talking about death with younger children.

51  
52  
53  
54  
55  
56 *"I was searching the Internet for the words. But anything I came across was all quite*  
57 *childish. It was for young children really. It wasn't helpful for us to talk to my [teenage child]."*  
58 *[Bereaved relative; niece of the deceased; care home death; first interview]*

1  
2  
3  
4  
5 More often, relatives reflected it would have been helpful if they had ‘*someone to talk*  
6 *to*’ about how best to tell their children of the impending death rather than accessing websites.  
7  
8 Some relatives attempted to contact services that provide support to family on preparing  
9 children for a death. However, many found it challenging as the staff from these organisations  
10 were furloughed during the pandemic. A number of relatives reported their loved one had  
11 already died by the time a family support worker got in contact with them.  
12  
13  
14  
15  
16

17 *"I got in touch with [organisation name] and they said the lady working in family*  
18 *support was only working 2 days a week because of the coronavirus, so would get back in touch*  
19 *with me when back in the office on Friday. But mum died on the Thursday, so it was too late"*  
20 *[Bereaved relative; adult child of the deceased; hospital death; second interview]*  
21  
22  
23  
24  
25

26 While some parents did tell their children the significant adult was going to ‘*die*’, others  
27 informed their young children using phrases such as ‘*grandpa is going heaven soon*’ or ‘*granny*  
28 *is going to the stars soon*’. It seemed parents struggled to tell the children when a significant  
29 adult had died, preferring to use euphemisms such as ‘*passed-away*’ or ‘*star in the sky*’. Most  
30 relatives reflected it would have been ‘*easier*’ for the parents to tell the children of the death if  
31 HSCPs had provided advice and guidance on how to tell children a significant adult was going  
32 to die before this happened.  
33  
34  
35  
36  
37  
38  
39

40 *"I just wanted somebody to tell me how to start the conversation with them [the*  
41 *children] that granny was going to die. That's what was missing. I didn't want or need a perfect*  
42 *script, but some pointers on how to do it would have gone a long way"* [Bereaved relative;  
43 *adult child of the deceased; hospital death; second interview]*  
44  
45  
46  
47

## 48 **DISCUSSION**

49 There appears to be a striking mismatch between reports from HSCPs and relatives  
50 bereaved during the COVID-19 crisis about whether professionals had asked if patients had  
51 important relationships with children. The majority of participating HSCPs indicated that the  
52 team had ‘probably’ or ‘definitely asked’, whereas only 10.2% of relatives stated this had  
53 occurred. This disparity was also reflected in the HSCPs and families’ ratings of the perceived  
54 level of support about talking to children. Most HSCPs in this study were not aware if families  
55 had been offered support, and the majority of relatives stated that they had not been provided  
56  
57  
58  
59  
60



with advice or guidance from professionals in telling children about an anticipated death. These inconsistencies between professionals and relatives may reflect HSCPs' beliefs that the identification of children and family support falls within the remit of another member of the clinical team, but in practice this does not occur.<sup>9,10</sup>

Many children were not prepared for the death of a significant adult during the pandemic. Factors impacting this non-disclosure included adults' own lack of understanding about the declining health and impending death of their loved one, and parental beliefs that not telling the children someone close to them was going to die was protecting them from distress. Similar findings have been reported in the literature<sup>1,2,8,17</sup> Psychoeducational resources were less available to families during the pandemic and were sometimes perceived to be inappropriate for the child's age. Consequently, many children were not told the truth about their family member's health in their final weeks and days of life; when the death happened, parents continued to struggle to share this news with their children.

Professionals' felt they had insufficient time to engage in meaningful conversations with families about talking to children about illness and death during the COVID-19 crisis. A similar finding has been reported in the pre-pandemic literature.<sup>8,9,10</sup> Whilst acknowledging the multiple demands on HSCPs, particularly during a pandemic, the perceived lack of time for these conversations could be a form of avoidance, by which staff consciously or unconsciously protect themselves from this sensitive and emotionally demanding work.<sup>18</sup>

Some families were unsure how to tell their children someone in their life was going to die using age-appropriate language. It seems there are a lack of resources available to aid HSCPs ability to equip families with the necessary tools to have important conversations about death and dying with their children.<sup>9</sup> Parents wanted time with HSCPs to discuss the language they might use with their children to prepare and support them for a bereavement, rather than relying on written materials or websites.

### **Implications for practice**

Despite the perception held by many HSCPs, conversations about death and dying with children did not seem to be '*easier*' for parents during the COVID-19 pandemic. While general conversations about death have increased during the pandemic, the experience of

1  
2  
3 raising this topic with children may be different when someone in their own family is nearing  
4 end of life.<sup>19</sup> It is important that HSCPs do not make assumptions that families understand  
5 the reality of a relative's declining health or realise how important it is to have honest  
6 conversations with children about illness and death.  
7  
8  
9

10  
11  
12 Bereaved families have reflected it would have been helpful if HSCPs had started a  
13 conversation with them on how best to tell the children someone close to them was going to  
14 die.<sup>2</sup> This would require HSCP to: (1) understand the long-term benefits of effective  
15 communication for children's psychological wellbeing and family functioning; and (2)  
16 identify children within a patient's family and social network. HSCPs should ask their  
17 patients and/or the relatives 'do you have important relationships with children?'. This  
18 question should be universal and not based on a patient's age. While most of the patients in  
19 this study were later in life, the number of relationships an adult has with children is likely  
20 to increase with each successive generation. Additionally, the proportion of grandparents  
21 who provide formal or informal childcare for working parents means this population are  
22 significantly involved in the lives of children.<sup>20</sup> Crucially, when relationships with children  
23 are identified, HSCPs must have the training and resources needed to follow up with adults  
24 about *why* talking to children matters and *how* these conversations can be initiated with  
25 children of all ages.  
26  
27  
28  
29  
30  
31  
32  
33  
34  
35  
36  
37

### 38 **Strengths and limitations of the study**

39 This is the first known study that has included quantitative measures about family-  
40 centred conversations in end of life care. It is possible that bereaved relatives did not answer  
41 the survey questions about the children as this may not have been reflective of their family set-  
42 up. This research was embedded in a national survey of end of life experiences during the  
43 COVID-19 pandemic and some of the bereaved relatives interviewed did not have important  
44 relationships with children; however it was considered ethically appropriate in the method  
45 section to report the total number of interviews conducted. Findings are limited to an ethnically  
46 homogenous White population; future studies should investigate the experiences of preparing  
47 children for death from ethnic minority populations. Participants were self-selected to the  
48 survey which can lead to an unrepresentative sample of the overall population included.  
49  
50  
51  
52  
53  
54  
55  
56  
57

### 58 **Conclusion**

1  
2  
3  
4  
5  
6  
7  
8  
9  
10  
11  
12  
13  
14  
15  
16  
17  
18  
19  
20  
21  
22  
23  
24  
25  
26  
27  
28  
29  
30  
31  
32  
33  
34  
35  
36  
37  
38  
39  
40  
41  
42  
43  
44  
45  
46  
47  
48  
49  
50  
51  
52  
53  
54  
55  
56  
57  
58  
59  
60

There was a pronounced difference between bereaved relatives' and HSCPs' perceptions about identifying children affected by the anticipated death of an important adult during the COVID-19 pandemic. HSCPs have an important role in supporting families to initiate conversations with children about end of life in a timely and developmentally-sensitive manner. This is essential for the long-term psychological wellbeing of bereaved families and children.

### **ACKNOWLEDGEMENTS**

The authors would like to express their sincere thanks and gratitude to the bereaved relatives and professionals that participated in this study. The authors extend their thanks to Rosemary Hughes and Tamsin McGlinchey for conducting the interviews.

### **FUNDING**

The author(s) disclosed receipt of the following financial support for the research, authorship, and/or publication of this article:

There was no direct funding award for conducting this study. Data analysis and manuscript preparation was supported by funding from the Westminster Foundation awarded to University of Oxford.

### **DATA AVAILABILITY STATEMENT**

The data that supports the findings of this study are available at the University of Oxford, University of Liverpool, and University of Sheffield's repositories and available on request from the second author. The data are not publicly available due to privacy and ethical restrictions.

### **ETHICAL STATEMENT**

The study passed ethical committee review from University of Liverpool [Ref: 7761].

### **CONFLICT OF INTEREST**

The author(s) declared no potential conflicts of interest with respect to the research, authorship, and/or publication of this article.

### **PATIENT CONSENT FOR PUBLICATION**

Not required

## AUTHOR CONTRIBUTIONS

Five authors were involved in the design of this study, survey dissemination, and data collection [CRM, SM, LJD, ER, JRH]. First interviews were conducted by two female researchers at the University of Liverpool. Second interviews were conducted by JRH. JRH analysed and interpreted the data. BM supported the quantitative analysis. JRH, ER, LJD drafted the manuscript. All authors critically reviewed the manuscript. JRH took responsibility for the submission process. JRH and ER are joint first authors of this paper.

## References

[1] Hanna JR, McCaughan E, Semple CJ. Challenges and support needs of parents and children when a parent is at end of life: a systematic review. *Palliative medicine*. 2019 Sep;33(8):1017-44.

<https://doi.org/10.1177/0269216319857622>

[2] Semple CJ, McCaughan E, Beck ER, Hanna JR. 'Living in parallel worlds'—bereaved parents' experience of family life when a parent with dependent children is at end of life from cancer: A qualitative study. *Palliative Medicine*. 2021 Mar 26:02692163211001719.

<https://doi.org/10.1177/02692163211001719>

[3] Marshall S, Fearnley R, Bristowe K, Harding R. The perspectives of children and young people affected by parental life-limiting illness: An integrative review and thematic synthesis. *Palliative Medicine*. 2020 Nov 19:0269216320967590. <https://doi.org/10.1177/0269216320967590>

[4] Dalton L, Rapa E, Ziebland S, Rochat T, Kelly B, Hanington L, Bland R, Yousafzai A, Stein A, Betancourt T, Bluebond-Langner M. Communication with children and adolescents about the diagnosis of a life-threatening condition in their parent. *The Lancet*. 2019 Mar 16;393(10176):1164-76. [https://doi.org/10.1016/S0140-6736\(18\)33201-X](https://doi.org/10.1016/S0140-6736(18)33201-X)

[5] Ellis J, Dowrick C, Lloyd-Williams M. The long-term impact of early parental death: lessons from a narrative study. *Journal of the Royal Society of Medicine*. 2013 Feb;106(2):57-67.

<https://doi.org/10.1177/0141076812472623>

[6] Fearnley R, Boland JW. Communication and support from health-care professionals to families, with dependent children, following the diagnosis of parental life-limiting illness: a systematic review. *Palliative medicine*. 2017 Mar;31(3):212-22. <https://doi.org/10.1177/0269216316655736>

[7] McCaughan E, Semple CJ, Hanna JR. 'Don't forget the children': a qualitative study when a parent is at end of life from cancer. *Supportive Care in Cancer*. 2021 Jun 18:1-8. <https://doi.org/10.1007/s00520-021-06341-3>

[8] Dalton LJ, McNivan A, Hanna JR, Stein A, Rapa E. Family centred communication when an adult patient is diagnosed with a life-threatening condition. In prep. 2021

[9] Hanna JR, McCaughan E, Beck ER, Semple CJ. Providing care to parents dying from cancer with dependent children: Health and social care professionals' experience. *Psycho-Oncology*. 2021 Mar;30(3):331-9. <https://doi.org/10.1002/pon.5581>

[10] Franklin P, Arber A, Reed L, Ream E. Health and social care professionals' experiences of supporting parents and their dependent children during, and following, the death of a parent: a qualitative review and thematic synthesis. *Palliative medicine*. 2019 Jan;33(1):49-65. <https://doi.org/10.1177/0269216318803494>

[11] Hanna JR, Rapa E, Dalton LJ, Hughes R, McGlinchey T, Bennett KM, Donnellan WJ, Mason SR, Mayland CR. A qualitative study of bereaved relatives' end of life experiences during the COVID-19 pandemic. *Palliative Medicine*. 2021 Mar 30:02692163211004210. <https://doi.org/10.1177/02692163211004210>

[12] Hanna JR, Rapa E, Dalton LJ, Hughes R, Quarmby LM, McGlinchey T, Donnellan WJ, Bennett KM, Mayland CR, Mason SR. Health and social care professionals' experiences of providing end of life care during the COVID-19 pandemic. *Palliative Medicine*. 2021. May

[13] Creswell JW, Tashakkori A. Developing publishable mixed methods manuscripts. <https://doi.org/10.1177/1558689806298644>

[14] Mayland CR, Hughes R, Lane S, McGlinchey T, Donnellan WJ, Bennett KM, Hanna JR, Rapa E, Dalton LJ, Mason SR. Are public health measures and individualised care compatible in the face of a pandemic? A national observational study of bereaved relatives' experiences during the COVID-19 pandemic. *Palliative Medicine*. 2021 May 31 <https://doi.org/10.1177/02692163211019885>

[15] Braun V, Clarke V. Reflecting on reflexive thematic analysis. *Qualitative Research in Sport, Exercise and Health*. 2019 Aug 8;11(4):589-97.

[16] Walshe C. Mixed method research in palliative care. In: MacLeod R, Van den Block L (Eds). Textbook of Palliative Care. Springer, Cham. [https://doi.org/10.1007/978-3-319-77740-5\\_109](https://doi.org/10.1007/978-3-319-77740-5_109).

[17] Kennedy VL, Lloyd-Williams M. Information and communication when a parent has advanced cancer. *Journal of affective disorders*. 2009 Apr 1;114(1-3):149-55. <https://doi.org/10.1016/j.jad.2008.06.022>

[18] Geerse OP, Lamas DJ, Sanders JJ, Paladino J, Kavanagh J, Henrich NJ, Berendsen AJ, Hiltermann TJ, Fromme EK, Bernacki RE, Block SD. A qualitative study of serious illness conversations in patients with advanced cancer. *Journal of palliative medicine*. 2019 Jul 1;22(7):773-81. <https://doi.org/10.1089/jpm.2018.0487>

[19] Caughlin JP, Mikucki-Enyart SL, Middleton AV, Stone AM, Brown LE. Being open without talking about it: A rhetorical/normative approach to understanding topic avoidance in families after a lung cancer diagnosis. *Communication Monographs*. 2011 Dec 1;78(4):409-36. <https://doi.org/10.1080/03637751.2011.618141>

[20] Buchanan A, Rotkirch A. 'Twenty-first century grandparents: global perspectives on changing roles and consequences.' *Contemporary Social Science*. 2018; 13(2), 131-144. <https://doi.org/10.1080/21582041.2018.1467034>.

**Table 1: Semi-structured topic guide used to guide the conduct of the study**

**Initial topics based on the literature and study aims and objectives**

- Exploration of end of life experiences during the COVID-19 pandemic.
- Exploration of how relatives managed the final weeks and days of life with their dependent children.
- Exploration of the needs of families as they prepared children for a death during the COVID-19 pandemic.
- Exploration of professionals' perceptions of the needs of families as they prepared children for death during the COVID-19 pandemic.
- Exploration of professionals' perceptions of the psychosocial needs of families when a relative was dying during the pandemic in relation to their children.

**Sample of additional topics for follow-up interviews**

- Professionals' role in providing psychological support to families at end of life about important relationships with dependent children.
- Professionals' role in signposting families to family support services during the COVID-19 pandemic.
- Families' engagement with family support services when a relative was at end of life during the COVID-19 pandemic.
- Children's involvement in the family when a relative was at end of life during the COVID-19 pandemic.

**Table 2: Survey responses from bereaved relatives**

|                                                       | <b>Total responders</b> | <b>Yes, certainly (%)</b> | <b>Yes, probably (%)</b> | <b>No, probably not (%)</b> | <b>No, certainly not (%)</b> |
|-------------------------------------------------------|-------------------------|---------------------------|--------------------------|-----------------------------|------------------------------|
| Q. Was the person who died infected with Coronavirus? | 256                     | 82 (32%)                  | 28 (11%)                 | 54 (21.1%)                  | 92 (35.9%)                   |

**Table 3: Characteristics of the bereaved relatives and HSCPs who completed the survey**

| <b>Characteristics of HSCPs surveyed</b> | <i>N</i> | <b>Characteristics of bereaved relatives survey</b>              | <i>N</i> |
|------------------------------------------|----------|------------------------------------------------------------------|----------|
| <b>Professional role</b>                 |          | <b>Gender of participant</b>                                     |          |
| Doctor                                   | 114      | Female                                                           | 216      |
| Nurse                                    | 155      | Male                                                             | 59       |
| Pharmacist                               | 1        | Non-binary                                                       | 1        |
| Physiotherapist                          | 13       | Other                                                            | 1        |
| Occupational therapist                   | 2        | Missing                                                          | 1        |
| Chaplain                                 | 5        | <b>Participant's relationship to the family member that died</b> |          |
| Speech and language therapist            | 4        | Son/daughter                                                     | 174      |
| Dietician                                | 1        | Spouse / partner                                                 | 22       |
| Social care professional                 | 2        | Parent                                                           | 4        |
| Healthcare assistant                     | 23       | Son/daughter in-law                                              | 12       |
| Volunteer                                | 5        | Niece/nephew                                                     | 13       |
| Other (no details / free text provided)  | 13       | Grandchild                                                       | 19       |
| Missing                                  | 5        | Sibling                                                          | 6        |
| <b>Location of professional</b>          |          | Friend                                                           | 14       |
| England                                  | 247      | Other                                                            | 14       |
| Scotland                                 | 58       | <b>Location of death</b>                                         |          |
| Wales                                    | 7        | England                                                          | 179      |
| Northern Ireland                         | 25       | Scotland                                                         | 63       |
| Missing                                  | 8        | Wales                                                            | 10       |
|                                          |          | Northern Ireland                                                 | 7        |
|                                          |          | Missing                                                          | 19       |
|                                          |          | <b>Place of death</b>                                            |          |
|                                          |          | Hospital                                                         | 75       |
|                                          |          | <i>General ward (n = 34)</i>                                     |          |
|                                          |          | <i>Intensive care unit (n = 13)</i>                              |          |
|                                          |          | <i>Coronavirus ward (n = 26)</i>                                 |          |
|                                          |          | <i>Other (n = 2)</i>                                             |          |
|                                          |          | Usual place of care                                              | 192      |
|                                          |          | <i>Home (n = 30)</i>                                             |          |

|  |  |                                                           |    |
|--|--|-----------------------------------------------------------|----|
|  |  | <i>Care home (n = 162)</i>                                |    |
|  |  | Hospice                                                   | 10 |
|  |  | Missing                                                   | 1  |
|  |  | <b>Was the person who died infected with Coronavirus?</b> |    |
|  |  | Yes, certainly                                            | 82 |
|  |  | Yes, probably                                             | 28 |
|  |  | No, probably not                                          | 54 |
|  |  | No, certainly not                                         | 92 |
|  |  | Missing                                                   | 22 |

**Table 4: Characteristics of the bereaved relatives and HSCPs interviewed in the study recruited to the study**

| <b>Characteristics of HSCPs interviewed</b> | <i>N</i> | <b>Characteristics of bereaved relatives interviewed</b>         | <i>N</i> |
|---------------------------------------------|----------|------------------------------------------------------------------|----------|
| <b>Hospital based professionals</b>         |          | <b>Gender of participant</b>                                     |          |
| Palliative care social worker               | 1        | Female                                                           | 12       |
| Palliative care consultant                  | 1        | Male                                                             | 7        |
| Palliative care clinical nurse specialist   | 2        | <b>Participant's relationship to the family member that died</b> |          |
| Palliative care team leader (nurse)         | 1        | Spouse/partner                                                   | 4        |
| Registered nurse                            | 1        | Adult child                                                      | 11       |
| Healthcare chaplain                         | 1        | Adult grandchild                                                 | 1        |
| Healthcare assistant                        | 1        | Son/daughter in-law                                              | 2        |
| Junior doctor                               | 2        | Niece                                                            | 1        |
| <b>Care home based professionals</b>        |          | <b>Ethnicity of relative/deceased</b>                            |          |
| Registered nurse                            | 2        | White                                                            | 19       |
| Palliative care registered nurse            | 1        | (English/Welsh/Scottish/Northern Irish/British)                  |          |
| <b>Hospice based professionals</b>          |          | <b>Location of relative/death</b>                                |          |
| Palliative care clinical nurse specialist   | 1        | England                                                          | 14       |
| Palliative care consultant                  | 1        | Scotland                                                         | 4        |
| Palliative care nurse                       | 1        | Wales                                                            | 1        |
| <b>Location of professional</b>             |          | Northern Ireland                                                 | 0        |
| England                                     | 8        | <b>Place of death</b>                                            |          |
| Scotland                                    | 5        | Hospital                                                         | 10       |
| Wales                                       | 2        | <i>General ward (n = 3)</i>                                      |          |
| Northern Ireland                            | 1        | <i>Intensive care unit (n = 4)</i>                               |          |
| <b>Gender of professional</b>               |          | <i>Coronavirus ward (n = 3)</i>                                  |          |
| Female                                      | 11       | Care home                                                        | 9        |
| Male                                        | 5        |                                                                  |          |



|                                                                                                           |           |                                                                                                                                                                                                                                                                                                                                                                                                                                               |                                                                                                                                |
|-----------------------------------------------------------------------------------------------------------|-----------|-----------------------------------------------------------------------------------------------------------------------------------------------------------------------------------------------------------------------------------------------------------------------------------------------------------------------------------------------------------------------------------------------------------------------------------------------|--------------------------------------------------------------------------------------------------------------------------------|
| <p><b>Ethnicity of professional</b><br/>White<br/>(English/Welsh/Scottish/Northern<br/>Irish/British)</p> | <p>16</p> | <p><b>Chronic condition of deceased family member</b><br/>Dementia<br/>Cancer<br/>Heart failure<br/>COPD<br/>Renal disease<br/>None identified</p> <p><b>Age of participant</b><br/>20 – 29<br/>30 – 39<br/>40 – 49<br/>50 – 59<br/>60 – 69<br/>70 – 79</p> <p><b>Age of family member that died</b><br/>50 – 59<br/>60 – 69<br/>70 – 79<br/>80 – 89<br/>90+</p> <p><b>Age of the children</b><br/>0 – 11 years old<br/>12 – 18 years old</p> | <p>8<br/>4<br/>3<br/>2<br/>1<br/>1</p> <p>1<br/>2<br/>1<br/>8<br/>6<br/>1</p> <p>1<br/>2<br/>2<br/>9<br/>3</p> <p>15<br/>9</p> |
|-----------------------------------------------------------------------------------------------------------|-----------|-----------------------------------------------------------------------------------------------------------------------------------------------------------------------------------------------------------------------------------------------------------------------------------------------------------------------------------------------------------------------------------------------------------------------------------------------|--------------------------------------------------------------------------------------------------------------------------------|

**Table 5: Survey responses from HSCPs**

|                                                                                                                                        | Total responders | Yes, definitely (%)   | Yes, probably (%)     | No, probably not (%) | No, definitely (%)  | I don't know (%)      |
|----------------------------------------------------------------------------------------------------------------------------------------|------------------|-----------------------|-----------------------|----------------------|---------------------|-----------------------|
| <p>Q. Did the healthcare team ask whether the patient had important relationships with children or young adults (age 0 –18 years)?</p> | <p>105</p>       | <p>39<br/>(37.1%)</p> | <p>33<br/>(31.4%)</p> | <p>7<br/>(6.7%)</p>  | <p>7<br/>(6.7%)</p> | <p>19<br/>(18.1%)</p> |

**Table 6: Survey responses from bereaved relatives**

|                                                                                                                                        | <b>Total responders</b> | <b>Yes (%)</b> | <b>No (%)</b> |
|----------------------------------------------------------------------------------------------------------------------------------------|-------------------------|----------------|---------------|
| Q. Did anyone in the healthcare team ask if your relative/friend had any important relationships with children (age 0 – 18 years old)? | 108                     | 11<br>(10.2%)  | 97<br>(89.8%) |

**Table 7: Survey responses from HSCPs**

|                                                                                                                                                             | <b>Total responders</b> | <b>Excellent (%)</b> | <b>Good (%)</b> | <b>Fair (%)</b> | <b>Poor (%)</b> | <b>I don't know (%)</b> |
|-------------------------------------------------------------------------------------------------------------------------------------------------------------|-------------------------|----------------------|-----------------|-----------------|-----------------|-------------------------|
| Q. How would you assess the overall level of support given by the healthcare team to relatives/friends about talking to children about a patient's illness? | 65                      | 11<br>(16.9%)        | 10<br>(15.4%)   | 6<br>(9.2%)     | 4<br>(6.2%)     | 34<br>(52.3%)           |

**Table 8: Survey responses from bereaved relatives**

|                                                                                                                       | <b>Total responders</b> | <b>Strongly agree (%)</b> | <b>Agree (%)</b> | <b>Neither agree nor disagree (%)</b> | <b>Disagree (%)</b> | <b>Strongly disagree (%)</b> |
|-----------------------------------------------------------------------------------------------------------------------|-------------------------|---------------------------|------------------|---------------------------------------|---------------------|------------------------------|
| Q. I was given enough help and support by the healthcare team to talk to children about my relative/friend's illness? | 75                      | 9<br>(12%)                | 4<br>(5.3%)      | 23<br>(30.7%)                         | 19<br>(25.3%)       | 20<br>(26.7%)                |

**\*\*Figure Legend\*\***

Figure 1: Flowchart illustrating the participants involved in the quantitative and qualitative phases of this study. In phase one, a total of 623 respondents completed the quantitative survey, comprising of 278 bereaved relatives and 345 HSCPs. In phase two, 35 qualitative interviews were conducted; of which 19 were bereaved relatives and 16 were HSCPs.

1  
2  
3  
4  
5  
6  
7  
8  
9  
10  
11  
12  
13  
14  
15  
16  
17  
18  
19  
20  
21  
22  
23  
24  
25  
26  
27  
28  
29  
30  
31  
32  
33  
34  
35  
36  
37  
38  
39  
40  
41  
42  
43  
44  
45  
46  
47  
48  
49  
50  
51  
52  
53  
54  
55  
56  
57  
58  
59  
60

For peer review only

Figure 1: Flowchart illustrating the participants involved in the quantitative and qualitative phases of this study. In phase one, a total of 623 respondents completed the quantitative survey, comprising of 278 bereaved relatives and 345 HSCPs. In phase two, 35 qualitative interviews were conducted; of which 19 were bereaved relatives and 16 were HSCPs.



1  
2  
3 **Supplementary file**  
4  
5

6 **Family-centred questions included in the survey for bereaved relatives.**  
7

8 **1. Did anyone in the healthcare team ask if your relative/friend had any important**  
9 **relationships with children (age 0 – 18 years)?**  
10

11 Yes / No  
12  
13

14  
15 **2. I was given enough help and support by the healthcare team to talk to children about**  
16 **my relative/friend's illness?**  
17

18 Strongly agree / Agree / Neither agree nor disagree / Disagree / Strongly disagree  
19  
20  
21

22 **Family-centred questions included in the survey for HSCPs.**  
23  
24

25  
26 **1. Did the healthcare team ask whether the patient had important relationships with**  
27 **children or young adults (age 0 –18 years)?**  
28

29 Yes, definitely / Yes, probably / No, probably not / No, definitely not / I don't know  
30  
31

32 **2. How would you assess the overall level of support given by the healthcare team to**  
33 **relatives/friends about talking to children about a patient's illness?**  
34

35 Excellent / Good / Fair/ Poor / I don't know  
36  
37  
38  
39  
40  
41  
42  
43  
44  
45  
46  
47  
48  
49  
50  
51  
52  
53  
54  
55  
56  
57  
58  
59  
60

## Standards for Reporting Qualitative Research (SRQR)\*

<http://www.equator-network.org/reporting-guidelines/srqr/>

Page/line no(s).

### Title and abstract

|                                                                                                                                                                                                                                                              |   |
|--------------------------------------------------------------------------------------------------------------------------------------------------------------------------------------------------------------------------------------------------------------|---|
| <p><b>Title</b> - Concise description of the nature and topic of the study Identifying the study as qualitative or indicating the approach (e.g., ethnography, grounded theory) or data collection methods (e.g., interview, focus group) is recommended</p> | 1 |
| <p><b>Abstract</b> - Summary of key elements of the study using the abstract format of the intended publication; typically includes background, purpose, methods, results, and conclusions</p>                                                               | 3 |

### Introduction

|                                                                                                                                                                     |   |
|---------------------------------------------------------------------------------------------------------------------------------------------------------------------|---|
| <p><b>Problem formulation</b> - Description and significance of the problem/phenomenon studied; review of relevant theory and empirical work; problem statement</p> | 4 |
| <p><b>Purpose or research question</b> - Purpose of the study and specific objectives or questions</p>                                                              | 4 |

### Methods

|                                                                                                                                                                                                                                                                                                                                                                                                             |     |
|-------------------------------------------------------------------------------------------------------------------------------------------------------------------------------------------------------------------------------------------------------------------------------------------------------------------------------------------------------------------------------------------------------------|-----|
| <p><b>Qualitative approach and research paradigm</b> - Qualitative approach (e.g., ethnography, grounded theory, case study, phenomenology, narrative research) and guiding theory if appropriate; identifying the research paradigm (e.g., postpositivist, constructivist/ interpretivist) is also recommended; rationale**</p>                                                                            | 4/5 |
| <p><b>Researcher characteristics and reflexivity</b> - Researchers' characteristics that may influence the research, including personal attributes, qualifications/experience, relationship with participants, assumptions, and/or presuppositions; potential or actual interaction between researchers' characteristics and the research questions, approach, methods, results, and/or transferability</p> | 6   |
| <p><b>Context</b> - Setting/site and salient contextual factors; rationale**</p>                                                                                                                                                                                                                                                                                                                            | 6   |
| <p><b>Sampling strategy</b> - How and why research participants, documents, or events were selected; criteria for deciding when no further sampling was necessary (e.g., sampling saturation); rationale**</p>                                                                                                                                                                                              | 6   |
| <p><b>Ethical issues pertaining to human subjects</b> - Documentation of approval by an appropriate ethics review board and participant consent, or explanation for lack thereof; other confidentiality and data security issues</p>                                                                                                                                                                        | 7   |
| <p><b>Data collection methods</b> - Types of data collected; details of data collection procedures including (as appropriate) start and stop dates of data collection and analysis, iterative process, triangulation of sources/methods, and modification of procedures in response to evolving study findings; rationale**</p>                                                                             | 6   |

|                       |                                                                                                                                                                                                                                                       |     |
|-----------------------|-------------------------------------------------------------------------------------------------------------------------------------------------------------------------------------------------------------------------------------------------------|-----|
| 1<br>2<br>3<br>4<br>5 | <b>Data collection instruments and technologies</b> - Description of instruments (e.g., interview guides, questionnaires) and devices (e.g., audio recorders) used for data collection; if/how the instrument(s) changed over the course of the study | 6   |
| 6<br>7<br>8           | <b>Units of study</b> - Number and relevant characteristics of participants, documents, or events included in the study; level of participation (could be reported in results)                                                                        | 6   |
| 9<br>10<br>11<br>12   | <b>Data processing</b> - Methods for processing data prior to and during analysis, including transcription, data entry, data management and security, verification of data integrity, data coding, and anonymization/de-identification of excerpts    | 6/7 |
| 13<br>14<br>15<br>16  | <b>Data analysis</b> - Process by which inferences, themes, etc., were identified and developed, including the researchers involved in data analysis; usually references a specific paradigm or approach; rationale**                                 | 6/7 |
| 17<br>18<br>19<br>20  | <b>Techniques to enhance trustworthiness</b> - Techniques to enhance trustworthiness and credibility of data analysis (e.g., member checking, audit trail, triangulation); rationale**                                                                | 6/7 |

### Results/findings

|                      |                                                                                                                                                                                                   |      |
|----------------------|---------------------------------------------------------------------------------------------------------------------------------------------------------------------------------------------------|------|
| 23<br>24<br>25<br>26 | <b>Synthesis and interpretation</b> - Main findings (e.g., interpretations, inferences, and themes); might include development of a theory or model, or integration with prior research or theory | 7-13 |
| 27<br>28<br>29       | <b>Links to empirical data</b> - Evidence (e.g., quotes, field notes, text excerpts, photographs) to substantiate analytic findings                                                               | 7-13 |

### Discussion

|                                  |                                                                                                                                                                                                                                                                                                                                                                                                             |       |
|----------------------------------|-------------------------------------------------------------------------------------------------------------------------------------------------------------------------------------------------------------------------------------------------------------------------------------------------------------------------------------------------------------------------------------------------------------|-------|
| 32<br>33<br>34<br>35<br>36<br>37 | <b>Integration with prior work, implications, transferability, and contribution(s) to the field</b> - Short summary of main findings; explanation of how findings and conclusions connect to, support, elaborate on, or challenge conclusions of earlier scholarship; discussion of scope of application/generalizability; identification of unique contribution(s) to scholarship in a discipline or field | 13-15 |
| 38<br>39                         | <b>Limitations</b> - Trustworthiness and limitations of findings                                                                                                                                                                                                                                                                                                                                            | 15    |

### Other

|                |                                                                                                                                               |    |
|----------------|-----------------------------------------------------------------------------------------------------------------------------------------------|----|
| 42<br>43<br>44 | <b>Conflicts of interest</b> - Potential sources of influence or perceived influence on study conduct and conclusions; how these were managed | 16 |
| 45<br>46       | <b>Funding</b> - Sources of funding and other support; role of funders in data collection, interpretation, and reporting                      | 16 |

\*The authors created the SRQR by searching the literature to identify guidelines, reporting standards, and critical appraisal criteria for qualitative research; reviewing the reference lists of retrieved sources; and contacting experts to gain feedback. The SRQR aims to improve the transparency of all aspects of qualitative research by providing clear standards for reporting qualitative research.

\*\*The rationale should briefly discuss the justification for choosing that theory, approach, method, or technique rather than other options available, the assumptions and limitations implicit in those choices, and how those choices influence study conclusions and transferability. As appropriate, the rationale for several items might be discussed together.

**Reference:**

O'Brien BC, Harris IB, Beckman TJ, Reed DA, Cook DA. **Standards for reporting qualitative research: a synthesis of recommendations.** *Academic Medicine*, Vol. 89, No. 9 / Sept 2014  
DOI: 10.1097/ACM.0000000000000388

STROBE Statement—checklist of items that should be included in reports of observational studies

|                           | Item No | Recommendation                                                                                                                                                                             | Page No |
|---------------------------|---------|--------------------------------------------------------------------------------------------------------------------------------------------------------------------------------------------|---------|
| <b>Title and abstract</b> | 1       | (a) Indicate the study's design with a commonly used term in the title or the abstract                                                                                                     | 1       |
|                           |         | (b) Provide in the abstract an informative and balanced summary of what was done and what was found                                                                                        | 3       |
| <b>Introduction</b>       |         |                                                                                                                                                                                            |         |
| Background/rationale      | 2       | Explain the scientific background and rationale for the investigation being reported                                                                                                       | 4       |
| Objectives                | 3       | State specific objectives, including any prespecified hypotheses                                                                                                                           | 4       |
| <b>Methods</b>            |         |                                                                                                                                                                                            |         |
| Study design              | 4       | Present key elements of study design early in the paper                                                                                                                                    | 4/5     |
| Setting                   | 5       | Describe the setting, locations, and relevant dates, including periods of recruitment, exposure, follow-up, and data collection                                                            | 5       |
| Participants              | 6       | (a) <i>Cohort study</i> —Give the eligibility criteria, and the sources and methods of selection of participants. Describe methods of follow-up                                            | 5       |
|                           |         | <i>Case-control study</i> —Give the eligibility criteria, and the sources and methods of case ascertainment and control selection. Give the rationale for the choice of cases and controls |         |
|                           |         | <i>Cross-sectional study</i> —Give the eligibility criteria, and the sources and methods of selection of participants                                                                      |         |
|                           |         | (b) <i>Cohort study</i> —For matched studies, give matching criteria and number of exposed and unexposed                                                                                   |         |
|                           |         | <i>Case-control study</i> —For matched studies, give matching criteria and the number of controls per case                                                                                 |         |
| Variables                 | 7       | Clearly define all outcomes, exposures, predictors, potential confounders, and effect modifiers. Give diagnostic criteria, if applicable                                                   | 5/6     |



|                            |                                       |    |                                                                                                                                                                                               |     |
|----------------------------|---------------------------------------|----|-----------------------------------------------------------------------------------------------------------------------------------------------------------------------------------------------|-----|
| 1<br>2<br>3<br>4           | Data sources/<br>measurement          | 8* | For each variable of interest, give sources of data and details of methods of assessment (measurement). Describe comparability of assessment methods if there is more than one group          |     |
| 5<br>6                     | Bias                                  | 9  | Describe any efforts to address potential sources of bias                                                                                                                                     | n/a |
| 7<br>8                     | Study size                            | 10 | Explain how the study size was arrived at                                                                                                                                                     | n/a |
| 9<br>10<br>11              | Quantitative variables                | 11 | Explain how quantitative variables were handled in the analyses. If applicable, describe which groupings were chosen and why                                                                  | 6   |
| 12<br>13                   | Statistical methods                   | 12 | (a) Describe all statistical methods, including those used to control for confounding                                                                                                         | 6   |
| 14<br>15                   |                                       |    | (b) Describe any methods used to examine subgroups and interactions                                                                                                                           | n/a |
| 16<br>17                   |                                       |    | (c) Explain how missing data were addressed                                                                                                                                                   | n/a |
| 18<br>19<br>20<br>21<br>22 |                                       |    | (d) <i>Cohort study</i> —If applicable, explain how loss to follow-up was addressed<br><br><i>Case-control study</i> —If applicable, explain how matching of cases and controls was addressed | n/a |
| 23<br>24<br>25             |                                       |    | <i>Cross-sectional study</i> —If applicable, describe analytical methods taking account of sampling strategy                                                                                  |     |
| 26<br>27                   | (e) Describe any sensitivity analyses |    |                                                                                                                                                                                               |     |

Continued on next page

| <b>Results</b> |                          |     |                                                                                                                                                                                                              |       |
|----------------|--------------------------|-----|--------------------------------------------------------------------------------------------------------------------------------------------------------------------------------------------------------------|-------|
| 1              | Participants             | 13* | (a) Report numbers of individuals at each stage of study—eg numbers potentially eligible, examined for eligibility, confirmed eligible, included in the study, completing follow-up, and analysed            | 7     |
| 2              |                          |     | (b) Give reasons for non-participation at each stage                                                                                                                                                         | 7     |
| 3              |                          |     | (c) Consider use of a flow diagram                                                                                                                                                                           | n/a   |
| 4              | Descriptive data         | 14* | (a) Give characteristics of study participants (eg demographic, clinical, social) and information on exposures and potential confounders                                                                     | 7     |
| 5              |                          |     | (b) Indicate number of participants with missing data for each variable of interest                                                                                                                          | 7     |
| 6              |                          |     | (c) <i>Cohort study</i> —Summarise follow-up time (eg, average and total amount)                                                                                                                             | na    |
| 7              | Outcome data             | 15* | <i>Cohort study</i> —Report numbers of outcome events or summary measures over time                                                                                                                          | na    |
| 8              |                          |     | <i>Case-control study</i> —Report numbers in each exposure category, or summary measures of exposure                                                                                                         | na    |
| 9              |                          |     | <i>Cross-sectional study</i> —Report numbers of outcome events or summary measures                                                                                                                           | na    |
| 10             | Main results             | 16  | (a) Give unadjusted estimates and, if applicable, confounder-adjusted estimates and their precision (eg, 95% confidence interval). Make clear which confounders were adjusted for and why they were included | 7-13  |
| 11             |                          |     | (b) Report category boundaries when continuous variables were categorized                                                                                                                                    | na    |
| 12             |                          |     | (c) If relevant, consider translating estimates of relative risk into absolute risk for a meaningful time period                                                                                             | na    |
| 13             | Other analyses           | 17  | Report other analyses done—eg analyses of subgroups and interactions, and sensitivity analyses                                                                                                               | 7-13  |
| 14             | <b>Discussion</b>        |     |                                                                                                                                                                                                              |       |
| 15             | Key results              | 18  | Summarise key results with reference to study objectives                                                                                                                                                     | 13-15 |
| 16             | Limitations              | 19  | Discuss limitations of the study, taking into account sources of potential bias or imprecision. Discuss both direction and magnitude of any potential bias                                                   | 15    |
| 17             | Interpretation           | 20  | Give a cautious overall interpretation of results considering objectives, limitations, multiplicity of analyses, results from similar studies, and other relevant evidence                                   | 14-15 |
| 18             | Generalisability         | 21  | Discuss the generalisability (external validity) of the study results                                                                                                                                        | 14-15 |
| 19             | <b>Other information</b> |     |                                                                                                                                                                                                              |       |
| 20             | Funding                  | 22  | Give the source of funding and the role of the funders for the present study and, if applicable, for the original study on which the present article is based                                                | 15    |

1 \*Give information separately for cases and controls in case-control studies and, if applicable, for exposed and unexposed groups in  
2 cohort and cross-sectional studies.  
3

4 **Note:** An Explanation and Elaboration article discusses each checklist item and gives methodological background and published  
5 examples of transparent reporting. The STROBE checklist is best used in conjunction with this article (freely available on the Web  
6 sites of PLoS Medicine at <http://www.plosmedicine.org/>, Annals of Internal Medicine at <http://www.annals.org/>, and Epidemiology at  
7 <http://www.epidem.com/>). Information on the STROBE Initiative is available at [www.strobe-statement.org](http://www.strobe-statement.org).  
8  
9  
10  
11  
12  
13  
14  
15  
16  
17  
18  
19  
20  
21  
22  
23  
24  
25  
26  
27  
28  
29  
30  
31  
32  
33  
34  
35  
36  
37  
38  
39  
40  
41  
42  
43  
44  
45  
46  
47  
48  
49  
50  
51  
52  
53  
54  
55  
56  
57  
58  
59  
60

For peer review only

# BMJ Open

## Experiences of preparing children for a death of an important adult during the COVID-19 pandemic: A mixed methods study

|                                 |                                                                                                                                                                                                                                                                                                                                                                                                                                                                                                 |
|---------------------------------|-------------------------------------------------------------------------------------------------------------------------------------------------------------------------------------------------------------------------------------------------------------------------------------------------------------------------------------------------------------------------------------------------------------------------------------------------------------------------------------------------|
| Journal:                        | <i>BMJ Open</i>                                                                                                                                                                                                                                                                                                                                                                                                                                                                                 |
| Manuscript ID                   | bmjopen-2021-053099.R2                                                                                                                                                                                                                                                                                                                                                                                                                                                                          |
| Article Type:                   | Original research                                                                                                                                                                                                                                                                                                                                                                                                                                                                               |
| Date Submitted by the Author:   | 31-Jul-2021                                                                                                                                                                                                                                                                                                                                                                                                                                                                                     |
| Complete List of Authors:       | Rapa, Elizabeth; Oxford University, Department of Psychiatry<br>Hanna, Jeffrey; Oxford University, Department of Psychiatry<br>Mayland, C; The University of Sheffield, Department of Oncology and Metabolism; University of Liverpool, Palliative Care Institute Liverpool<br>Mason, Stephen; University of Liverpool, Palliative Care Institute Liverpool<br>Moltrecht, Bettina; Oxford University, Department of Psychiatry<br>Dalton, Louise J; Oxford University, Department of Psychiatry |
| <b>Primary Subject Heading</b>: | Palliative care                                                                                                                                                                                                                                                                                                                                                                                                                                                                                 |
| Secondary Subject Heading:      | Palliative care                                                                                                                                                                                                                                                                                                                                                                                                                                                                                 |
| Keywords:                       | COVID-19, PALLIATIVE CARE, Adult palliative care < PALLIATIVE CARE                                                                                                                                                                                                                                                                                                                                                                                                                              |
|                                 |                                                                                                                                                                                                                                                                                                                                                                                                                                                                                                 |

SCHOLARONE™  
Manuscripts



I, the Submitting Author has the right to grant and does grant on behalf of all authors of the Work (as defined in the below author licence), an exclusive licence and/or a non-exclusive licence for contributions from authors who are: i) UK Crown employees; ii) where BMJ has agreed a CC-BY licence shall apply, and/or iii) in accordance with the terms applicable for US Federal Government officers or employees acting as part of their official duties; on a worldwide, perpetual, irrevocable, royalty-free basis to BMJ Publishing Group Ltd ("BMJ") its licensees and where the relevant Journal is co-owned by BMJ to the co-owners of the Journal, to publish the Work in this journal and any other BMJ products and to exploit all rights, as set out in our [licence](#).

The Submitting Author accepts and understands that any supply made under these terms is made by BMJ to the Submitting Author unless you are acting as an employee on behalf of your employer or a postgraduate student of an affiliated institution which is paying any applicable article publishing charge ("APC") for Open Access articles. Where the Submitting Author wishes to make the Work available on an Open Access basis (and intends to pay the relevant APC), the terms of reuse of such Open Access shall be governed by a Creative Commons licence – details of these licences and which [Creative Commons](#) licence will apply to this Work are set out in our licence referred to above.

Other than as permitted in any relevant BMJ Author's Self Archiving Policies, I confirm this Work has not been accepted for publication elsewhere, is not being considered for publication elsewhere and does not duplicate material already published. I confirm all authors consent to publication of this Work and authorise the granting of this licence.

# Experiences of preparing children for a death of an important adult during the COVID-19 pandemic: A mixed methods study

Elizabeth Rapa,<sup>1</sup> $\alpha$

Jeffrey R. Hanna,<sup>1</sup> $\alpha$ \*

Catriona R. Mayland,<sup>2,3</sup>

Stephen R. Mason,<sup>2</sup>

Bettina Moltrecht,<sup>1</sup>

&

Louise J Dalton<sup>1</sup>

\* indicates corresponding and senior author [jeffrey.hanna@psych.ox.ac.uk](mailto:jeffrey.hanna@psych.ox.ac.uk)

$\alpha$  indicates joint first authors for this manuscript

**1. Department of Psychiatry, University of Oxford, Warneford Hospital, Oxford, OX3 7JX**

2. Palliative Care Institute Liverpool, University of Liverpool, North West Cancer Research Centre, 200 London Road, Liverpool, L3 9TA

3. Department of Oncology and Metabolism, University of Sheffield, 2<sup>nd</sup> Floor Broomcross Building, Weston Park Hospital, Whitham Road, Sheffield, S10 2SJ

Dr. Elizabeth Rapa <https://orcid.org/0000-0001-8818-8148>

Dr. Jeffrey R. Hanna <https://orcid.org/0000-0002-8218-5939>

Dr. Stephen R. Mason <https://orcid.org/0000-0002-4020-6869>

Dr. Catriona R. Mayland <https://orcid.org/0000-0002-1440-9953>

Dr. Bettina Moltrecht <http://orcid.org/0000-0002-1838-428X>

Dr. Louise J. Dalton <https://orcid.org/0000-0003-1923-5769>

## ABSTRACT

**Objective:** The objectives of this study were to investigate how families prepared children for the death of a significant adult, and how health and social care professionals provided psychosocial support to families about a relative's death during the COVID-19 pandemic.

**Design/Setting:** A mixed-methods design; an observational survey with health and social care professionals and relatives bereaved during the COVID-19 pandemic in the United Kingdom, and in-depth interviews with bereaved relatives and professionals were conducted. Data were analysed thematically.

**Participants:** Total of 623 participants completed the survey and interviews were conducted with 19 bereaved relatives and 16 professionals.

**Results:** Many children were not prepared for a death of an important adult during the pandemic. Obstacles to preparing children included families' lack of understanding about their relative's declining health; parental beliefs that not telling children was protecting them from upset; and parents' uncertainty about how best to prepare their children for the death. Only 10.2% (n = 11) of relatives reported professionals asked them about their deceased relative's relationships with children. This contrasts with 68.5% (n = 72) of professionals who reported that the healthcare team asked about patient's relationships with children. Professionals did not provide families with psychosocial support to facilitate preparation, and resources were less available or inappropriate for families during the pandemic. Three themes were identified: (1) obstacles to telling children a significant adult is going to die, (2) professionals' role in helping families to prepare children for the death of a significant adult during the pandemic, and (3) how families prepare children for the death of a significant adult.

**Conclusions:** Professionals need to: provide clear and honest communication about a poor prognosis; start a conversation with families about the dying patient's significant relationships with children; and reassure families that telling children someone close to them is dying is beneficial for their longer-term psychological adjustment.

**KEYWORDS:** end of life, COVID-19, communication, children, family, health professionals, social care professionals, psychosocial support

### Strengths and limitations of this study

- First known study that has included quantitative measures about family-centred conversations in end of life care.

- To promote study rigour, second interviews were conducted with some participants to provide clarity on their end of life experiences during the pandemic.
- Findings are limited to an ethnically homogenous White population.
- There is a risk of bias as participants were self-selected to this study and a survey was distributed online with open participation and without direct sampling.

## BACKGROUND

Families are often unsure how best to prepare children (<18 years old) for the death of someone involved in their lives.<sup>1</sup> Literature reports that even when a death is expected the reality of a family member's poor prognosis is not fully shared with children.<sup>2,3</sup> Clear and honest communication with children about the declining health and impending death of a significant adult can promote psychosocial adjustment for children, including better mental and physical health outcomes and fewer referrals to psychiatric services.<sup>4,5</sup>

Parents within family groups have reported a desire and need for advice and guidance from health and social care professionals (HSCPs) about how, when, and what they should tell children regarding an impending death.<sup>1,2,6</sup> Despite the unique positioning of clinical services, families have highlighted a lack of supportive care from HSCPs about how to prepare and support children for a significant death.<sup>2,7</sup> HSCPs have reported family-centred conversations as an emotionally challenging aspect of their clinical role, often perceiving this to be the role of other healthcare colleagues<sup>8,9,10</sup>

Provision of family-centred care in clinical practice is likely to have been affected by the COVID-19 pandemic in the United Kingdom, including the increased practical and emotional pressures encountered by HSCPs<sup>11,12</sup>, and the absence of families visiting in hospital, care home and hospice settings. Exploration of bereaved relatives' and HSCPs' experiences and perceptions will aid our understanding of how families navigated preparing children for a death during the COVID-19 crisis. This will help inform current and future clinical practice on how families can be better supported as they prepare children for a bereavement.

### Aims and objectives

The aim of this study was to explore how families prepared children for a death during the COVID-19 pandemic in the United Kingdom. The objectives were to investigate:

- (1) how families navigated telling children someone close to them was going to die, and



(2) professionals' role in supporting families as they prepared children for a death.

## **METHODS**

### **Design and context**

A mixed-methods design was used for this study<sup>13</sup>; (1) relatives bereaved during the pandemic and HSCPs who provided end of life care during the same period completed an observational, open online survey, and (2) survey respondents who expressed an interest to provide further information were invited, via email, and participated in an in-depth qualitative interview regarding their experiences.

This study was embedded within a national quantitative United Kingdom survey which aimed to: (1) explore the experiences of bereaved relatives regarding end of life care during the COVID-19 pandemic, (2) understand the impact of COVID-19 on the bereavement process for relatives, and (3) explore the experiences of HSCPs who provided end of life care during the COVID-19 crisis. Other findings from this research have been published elsewhere.<sup>11,12,14</sup>

### **Patient and public involvement**

Five members from the online advisory panel of the Clinical Research and Innovation Office at Sheffield Teaching Hospitals NHS Trust, and the lead PPI representative from the Clinical Cancer Trials Executive Committee provided input to survey development. PPI involvement was helpful for ensuring the language/questioning was appropriate, and resulted in revisions, such as the inclusion of additional response criteria, such as adding 'don't know'.

### **Participants**

#### *Bereaved relatives*

Participants were considered eligible to complete the survey if they were  $\geq 18$  years old, experienced the death of a family member or close friend during the first wave of the COVID-19 pandemic (March – June 2020), and resided in the United Kingdom. There were no inclusion or exclusion criteria to the cause of the death. Of the 48 respondents that expressed an interest to be involved in follow-up research, a total of 19 relatives were interviewed; 28 potential participants did not respond to the interview invitation, and one declined.

#### *HSCPs*

1  
2  
3 HSCPs were considered eligible to take part in the survey if they provided end of life  
4 care during the first wave (March – June 2020) of the COVID-19 pandemic in the United  
5 Kingdom. For simplicity, the term ‘HSCP’ is used as a collective term to describe the range of  
6 professionals and individuals involved in end of life care and support. Seventy-eight  
7 respondents expressed an interest to be involved in follow up research. Of these, 16 took part  
8 in a qualitative interview; 60 did not respond to the invitation, and two replied stating they were  
9 no longer interested.

### 17 **Data collection**

18  
19 An online survey was developed using the Qualtrics platform. Initially, respondents  
20 were asked to select if they were a bereaved friend/relative or a HSCP. The survey included  
21 questions about support for families in relation to preparing children for a death during the  
22 COVID-19 pandemic; questions were developed by the research team and were different for  
23 relatives and professionals (see supplementary file). Appropriate demographic questions were  
24 asked, including age, gender and ethnicity, and relationship to the deceased or clinical role.  
25 The survey was promoted through social media platforms; public and charitable organisations  
26 related to palliative care and bereavement; and organisations of minoritised groups between  
27 June and September 2020.

28  
29 Semi-structured interviews were carried out between July and December 2020. Topic  
30 guides (Table 1) were developed, informed by the literature, the study’s aims and objectives,  
31 and the research team who have a wealth of research and clinical experience in end of life and  
32 bereavement care. Interviews were conducted by two female researchers, neither of whom had  
33 prior relationships with the participants. Interviews were conducted on Zoom (n = 9) or  
34 telephone (n = 26), audio-recorded, and lasted between 20 and 98 minutes.

35  
36 Audio-recordings were transcribed *verbatim* after all interviews were completed and  
37 verified by the research team. Preliminary analysis identified some of the categories developed  
38 from the transcript data required further clarification. Following discussion as a research team  
39 and a protocol/ethical amendment, JRH invited eight participants via email to take part in a  
40 second interview to provide clarity on their experiences. Four bereaved relatives and two  
41 HSCPs agreed to another interview. Two bereaved relatives declined the invitation due to a  
42 lack of interest to take part in further studies. The topic guide was iteratively modified by the  
43 authors who are experienced clinicians and researchers in family-centred care (Table 1).

1  
2  
3 Second interviews were conducted by JRH (an experienced qualitative researcher) on Zoom,  
4 April 2021, audio-recorded and lasted between 16 and 31 minutes.  
5  
6  
7

### 8 **Data analysis**

9  
10 Quantitative data were analysed using descriptive statistics within SPSS v.26 by JRH  
11 and BM. The qualitative data was analysed using reflexive thematic analysis.<sup>15</sup> JRH read and  
12 reread the transcripts to gain a sense of each participant's story; manually coded the data by  
13 marking similar phrases or words from participant's narratives; and identified where some of  
14 them constructed into themes, in combination with the quantitative data. This approach was  
15 undertaken to enhance and illustrate study findings.<sup>16</sup> ER and LJD independently reviewed the  
16 data resulting in the inclusion of one theme and renaming of two sub-themes. Themes were  
17 refined through critical dialogue with all authors.  
18  
19  
20  
21  
22  
23  
24  
25

### 26 **Ethical considerations**

27 Respondents opted into the study and were provided with written information about the  
28 research and provided consent prior to participation. Participants were not forced to answer  
29 questions within the survey and each question was optional. Respondents were only contacted  
30 to take part in interviews if they expressed an interest to be invited to provide further  
31 information. Oral consent was also collected at time of interview. Participants were aware of  
32 their right to pause, reschedule or terminate the interview. Data protection procedures were  
33 observed, and assurances of confidentiality were provided. Ethical approvals were obtained  
34 from University of Liverpool Central University Research Ethics Committee [Ref: 7761].  
35  
36  
37  
38  
39  
40  
41  
42

## 43 **RESULTS**

### 44 **Quantitative survey participants**

45 A total of 278 United Kingdom based bereaved relatives (216 female, 59 male, 3 other)  
46 completed the survey. The mean age of respondents was 53.4 years (range 19 – 87 years), and  
47 with a single exception, all were from a White British ethnic group. The respondents'  
48 relationship with the deceased included son/daughter (n = 174), spouse/partner (n = 22), parent  
49 (n = 4), son/daughter in-law (n = 12), niece/nephew (n = 13), grandchild (n = 19), sibling (n =  
50 6), friend (n = 14) and other (n = 14). The age of the deceased ranged from 22 to 103 years  
51 (mAvgAge = 81.6 years, SD 12.2). Most of the deaths took place in England (n = 179). Of the  
52 278 bereaved relatives, 110 reported their relative/friend 'definitely' or 'probably' had  
53 coronavirus (Table 2). In total, 345 HSCPs completed the survey, which included nurses (n =  
54  
55  
56  
57  
58  
59  
60

155), doctors (n = 114), allied health professionals (n = 28), social care professionals (n = 2), volunteers (n = 5), and healthcare assistants (n = 23). Eighteen professionals did not provide details about their role. Sample characteristics are reported in Table 3.

### Qualitative interviews participants

Overall, nineteen relatives (12 female, 7 male) and sixteen HSCPs (11 female, 5 male) were interviewed. The participant's relationship with their family member varied, including spouse/partner (n = 4); son/daughter in-law (n = 2); adult child (n = 11); grandchild (n = 1); and niece (n = 1). Most relatives (n = 16) reported the deceased had significant relationships with children (<18 years old), including parent (n = 2), grandparent (n = 14), and aunt/uncle (n = 3). The deceased were aged 50 – 59 years (n = 1), 60 – 69 years (n = 3), 70 – 79 years (n = 3), 80 – 89 (n = 9) or 90 years and over (n = 3). A range of HSCPs were involved, including registered nurses (n = 4); clinical nurse specialists (n = 3); team leaders (nurse) (n = 2); medical consultants (n = 2); junior doctors (n = 2), as well as a social worker; chaplain; and healthcare assistant. Additional sample characteristics are reported in Table 4. A summary of the participants involved in the quantitative and qualitative phases of this study are shown in Figure 1.

The data below describes relatives' and HSCPs' experiences and perceptions of the final weeks and days of life. Of the participants interviewed, relatives reported their dying family member was receiving care at a care home (n = 9) or hospital (n = 10) at end of life. Additionally, most relatives interviewed reported their dying family member was living with a chronic illness, and at a point during the pandemic their health condition had rapidly deteriorated; most also tested positive for COVID-19 (n = 13). HSCPs interviewed worked in acute (n = 10) and community (n = 6) settings. Data is discussed under three themes: (1) obstacles to telling the children a significant adult is going to die, (2) HSCPs' role in helping families to prepare children for the death of a significant adult during the pandemic, and (3) how families prepare children for the death of a significant adult.

#### Theme 1: Obstacles to telling children a significant adult is going to die

Where a significant adult had a poor prognosis, some relatives and HSCPs reported children had been informed and regularly updated by their parents about the declining health and impending death. In other families, children were reported by relatives and professionals as less prepared for the death. These issues are further discussed under two sub-themes (1)

parental beliefs that not telling children was protecting their children from distress, and (2) the family's lack of understanding about the decline in their loved one's health.

### **Sub-theme 1: Parental beliefs that not telling children was protecting their children from distress**

Relatives and professionals reflected that parents within the family network were unsure how they could tell their children that a significant adult was going to die or what age-appropriate language to use. Additionally, relatives reported that the children's parents were concerned about how children would react to the news. More often, relatives felt it was better *not* to tell the children about the seriousness of the family member's condition, in order to protect them from becoming upset.

*"I don't think they [referring to adult children] mentioned it then through his illness really. They weren't mentioning it on a daily basis or anything. They didn't think it was right to tell them [referring to dependent children] that their granda wasn't going to make it. I just think they didn't want to make them sad at that time" [Bereaved relative; spouse of the deceased; hospital-based death; first interview]*

Although most relatives reported an awareness that their family member's death was expected within weeks or days, it often seemed that the children continued to be less informed of the situation. On occasions, young children (<12 years old) in the family asked their parents to see (physically or virtually) their dying family member. At times, parents told their children 'you can't visit granny because of the virus but you hopefully will see her soon' or 'grandpa is very sick today but maybe tomorrow he will be better, and you can talk to him then'. Relatives and professionals considered this deliberate strategy was an attempt by parents to protect their children from distress.

### **Sub-theme 2: The family's lack of understanding about the decline in their loved one's health**

Some families reported an absence of clear information from HSCPs about their family member's condition at end of life; consequently, adult family members reflected that they themselves were unprepared for the death. On occasions, relatives felt they were provided with 'false hope' regarding their family member's condition when healthcare teams used phrases such as 'there has been no change and your mum is comfortable' or 'things are just the same

1  
2  
3 *and he is doing okay*'. Consequently, relatives stated that parents within the family network  
4 were not aware of the severity of the situation, resulting in parental uncertainty about whether  
5 or how to share this information with their children. Relatives reflected it would have been  
6 helpful if HSCPs had used clear language such as *'dying'* and *'end of life'* when describing the  
7 patient's condition to the family.  
8  
9

10  
11  
12  
13 *"Mum went into the hospital on the Friday around midnight and died on Sunday. I was*  
14 *ringing the hospital every few hours and they just kept saying 'she's still the same and she's*  
15 *comfortable'. We took that as good news that she was doing okay. And that's what we told the*  
16 *girls. That was all we knew, until I got the call on Sunday morning telling me to get to hospital*  
17 *right away as mum only had a few hours to live."* [Bereaved relative; adult children of the  
18 *deceased; hospital death; second interview]*  
19  
20  
21  
22  
23  
24

## 25 **Theme 2: HSCPs' role in helping families to prepare children for a significant death** 26 **during the pandemic** 27 28

29  
30  
31 Professionals provided varying amounts of psychosocial support to families during the  
32 pandemic, but on many occasions specific support in preparing children for a death was not  
33 offered. These issues are discussed under two sub-themes: (1) a lack of family-centred  
34 conversations, and (2) psychosocial support provided to families with children during the  
35 pandemic.  
36  
37  
38  
39

### 40 **Sub-theme 1: A lack of family-centred conversations during the pandemic** 41

42  
43 Of 105 responders, 68.5% (n = 72) of HSCPs reported that the healthcare team  
44 'probably' or 'definitely' asked relatives if the dying patient had important relationships with  
45 children (Table 5). This contrasts with reports from 108 bereaved relatives, of which only  
46 10.2% (n = 11) reported that HSCPs asked if the dying family member had important  
47 relationships with children (Table 6).  
48  
49  
50  
51

52  
53 Often, relatives perceived that healthcare teams were *'too busy'* during the pandemic to  
54 provide family centred support. Some relatives felt professionals would not have thought to  
55 ask if the dying patient had important relationships with children, as they were not of a typical  
56 age to have dependent children.  
57  
58  
59  
60

1  
2  
3  
4  
5  
6  
7  
8  
9  
10  
11  
12  
13  
14  
15  
16  
17  
18  
19  
20  
21  
22  
23  
24  
25  
26  
27  
28  
29  
30  
31  
32  
33  
34  
35  
36  
37  
38  
39  
40  
41  
42  
43  
44  
45  
46  
47  
48  
49  
50  
51  
52  
53  
54  
55  
56  
57  
58  
59  
60

*“Nobody asked me if I had children. I suppose they didn’t think to ask as my mother was 92 and I’m 67. It’s not something that I directly needed, but for my son that would have helped him and my daughter in-law. But at the same time, I don’t think the NHS staff had time for these things’ [Bereaved relative; adult child of the deceased; hospital-based death; first interview]*

HSCPs described increased pressures during the pandemic such as reduced staffing levels from sickness and increased workloads. Consequently, care was centred on clinical elements such as pain and symptom management. However, most professionals reflected that these obstacles to family centred conversations pre-dated the pandemic. On occasions, HSCPs felt the pandemic meant there was ‘less of a need to prioritise conversations about the children’ with relatives, as they perceived it would have been ‘easier’ for parents to talk to their children about a death due to increased general conversations and media coverage about dying.

*“It’s not really my role. And I’m not sure that that ever, if I’m honest is ever, that’s not really been part of what I do. It’s probably easier now with all that’s been going on over the last year.” [HSCP; palliative care registered nurse; care-home based; first interview]*

## **Sub-theme 2: Psychosocial support provided to families with children during the pandemic**

Respondents were asked to assess the overall level of support given by the healthcare team to relatives or friends about talking to children about a patient’s illness. Of the 65 HSCPs, 32.3% (n = 21) felt the level of support provided to relatives by healthcare teams regarding talking to children about the patient’s impending death was ‘excellent/good’, while 52.3% (n = 34) reported ‘I don’t know’ to the same question (Table 7). This contrasted with the responses from 75 bereaved relatives; 52% (n = 39) ‘disagreed/strongly disagreed’ that they had received enough support from HSCPs about talking to children about the impending death. Only 17.3% (n = 13) of bereaved relatives agreed/strongly agreed they had received adequate support from professionals (Table 8).

Due to restricted visiting to hospital, care home and hospice settings during the pandemic, some of the relatives and HSCPs interviewed reported that families had video calls with their dying family member when their health permitted. From these interviews, it appeared that HSCPs had an instrumental role in encouraging parents to involve children in virtual calls.

1  
2  
3 Some HSCPs believed it was important to include the children in virtual calls so they would  
4 feel part of the dying experience and help them understand the death. However, it seemed these  
5 virtual connections between dying family members and their relatives rarely happened, and  
6 where they did occur, children were only included if they had already been informed of the  
7 reality of the situation. Some professionals reflected this as a *'positive outcome for children in*  
8 *the pandemic'*, as pre-pandemic children were usually not involved when a significant adult  
9 was in the final weeks and days of life in hospital and care home settings.

10  
11  
12  
13  
14  
15  
16  
17 *"We're really quite keen on involving children as much as possible. But there had to*  
18 *be more thinking outside the box. We had in fact we even managed to facilitate a video between*  
19 *a dying mum and her children on one of our wards you know right at the height of COVID."*  
20 *[HSCP; palliative care social worker; hospital based; first interview]*

21  
22  
23  
24  
25  
26 Where children were identified in the family, HSCPs often felt they lacked adequate  
27 knowledge to provide meaningful support in the *'here and now'* and consequently signposted  
28 relatives to the websites of charities that provide family support or advice. Many HSCPs  
29 believed psychosocial support to families regarding children was provided by other colleagues,  
30 such as social care professionals or registered nurses on the wards or in the community.

31  
32  
33  
34  
35  
36 *"I didn't know what else I could have done in that moment. I think [charity name] are*  
37 *quite good with this sort of thing when it comes to illness and children. [HSCP; palliative care*  
38 *clinical nurse specialist; hospital based; first interview]*

### 41 42 43 **Theme 3: How families prepare children for the death of a significant adult**

44  
45 On occasions, parents reported that the websites to which they had been signposted by  
46 HSCPs were no longer available as the charity had ceased operations during the pandemic.  
47 Parents frequently reported that online information did not meet the developmental or cognitive  
48 needs of their children. Some parents searched the Internet for guidance on how best to share  
49 this information with their adolescent children (ages 13+) but felt the information they found  
50 online was centred on talking about death with younger children.

51  
52  
53  
54  
55  
56  
57 *"I was searching the Internet for the words. But anything I came across was all quite*  
58 *childish. It was for young children really. It wasn't helpful for us to talk to my [teenage child]."*  
59 *[Bereaved relative; niece of the deceased; care home death; first interview]*



1  
2  
3  
4  
5 More often, relatives reflected it would have been helpful if they had ‘*someone to talk*  
6 *to*’ about how best to tell their children of the impending death rather than accessing websites.  
7  
8 Some relatives attempted to contact services that provide support to family on preparing  
9 children for a death. However, many found it challenging as the staff from these organisations  
10 were furloughed during the pandemic. A number of relatives reported their loved one had  
11 already died by the time a family support worker got in contact with them.  
12  
13  
14  
15  
16

17 *"I got in touch with [organisation name] and they said the lady working in family*  
18 *support was only working 2 days a week because of the coronavirus, so would get back in touch*  
19 *with me when back in the office on Friday. But mum died on the Thursday, so it was too late"*  
20 *[Bereaved relative; adult child of the deceased; hospital death; second interview]*  
21  
22  
23  
24  
25

26 While some parents did tell their children the significant adult was going to ‘*die*’, others  
27 informed their young children using phrases such as ‘*grandpa is going heaven soon*’ or ‘*granny*  
28 *is going to the stars soon*’. It seemed parents struggled to tell the children when a significant  
29 adult had died, preferring to use euphemisms such as ‘*passed-away*’ or ‘*star in the sky*’. Most  
30 relatives reflected it would have been ‘*easier*’ for the parents to tell the children of the death if  
31 HSCPs had provided advice and guidance on how to tell children a significant adult was going  
32 to die before this happened.  
33  
34  
35  
36  
37  
38  
39

40 *"I just wanted somebody to tell me how to start the conversation with them [the*  
41 *children] that granny was going to die. That's what was missing. I didn't want or need a perfect*  
42 *script, but some pointers on how to do it would have gone a long way"* [Bereaved relative;  
43 *adult child of the deceased; hospital death; second interview]*  
44  
45  
46  
47

## 48 **DISCUSSION**

49 There appears to be a striking mismatch between reports from HSCPs and relatives  
50 bereaved during the COVID-19 crisis about whether professionals had asked if patients had  
51 important relationships with children. The majority of participating HSCPs indicated that the  
52 team had ‘probably’ or ‘definitely asked’, whereas only 10.2% (n = 11) of relatives stated this  
53 had occurred. This disparity was also reflected in the HSCPs and families’ ratings of the  
54 perceived level of support about talking to children. Most HSCPs in this study were not aware  
55 if families had been offered support, and the majority of relatives stated that they had not been  
56  
57  
58  
59  
60

1  
2  
3 provided with advice or guidance from professionals in telling children about an anticipated  
4 death. These inconsistencies between professionals and relatives may reflect HSCPs' beliefs  
5 that the identification of children and family support falls within the remit of another member  
6 of the clinical team, but in practice this does not occur.<sup>9,10</sup>  
7  
8  
9

10  
11  
12 Many children were not prepared for the death of a significant adult during the  
13 pandemic. Factors impacting this non-disclosure included adults' own lack of understanding  
14 about the declining health and impending death of their loved one, and parental beliefs that not  
15 telling the children someone close to them was going to die was protecting them from distress.  
16 Similar findings have been reported in the literature<sup>1,2,8,17</sup> Psychoeducational resources were  
17 less available to families during the pandemic and were sometimes perceived to be  
18 inappropriate for the child's age. Consequently, many children were not told the truth about  
19 their family member's health in their final weeks and days of life; when the death happened,  
20 parents continued to struggle to share this news with their children.  
21  
22  
23  
24  
25  
26  
27  
28

29 Professionals' felt they had insufficient time to engage in meaningful conversations  
30 with families about talking to children about illness and death during the COVID-19 crisis. A  
31 similar finding has been reported in the pre-pandemic literature.<sup>8,9,10</sup> Whilst acknowledging the  
32 multiple demands on HSCPs, particularly during a pandemic, the perceived lack of time for  
33 these conversations could be a form of avoidance, by which staff consciously or unconsciously  
34 protect themselves from this sensitive and emotionally demanding work.<sup>18</sup>  
35  
36  
37  
38  
39  
40

41 Some families were unsure how to tell their children someone in their life was going  
42 to die using age-appropriate language. It seems there are a lack of resources available to aid  
43 HSCPs ability to equip families with the necessary tools to have important conversations about  
44 death and dying with their children.<sup>9</sup> Parents wanted time with HSCPs to discuss the language  
45 they might use with their children to prepare and support them for a bereavement, rather than  
46 relying on written materials or websites.  
47  
48  
49  
50  
51  
52

53 Despite the perception held by many HSCPs, conversations about death and dying with  
54 children did not seem to be '*easier*' for parents during the COVID-19 pandemic. While general  
55 conversations about death have increased during the pandemic, the experience of raising this  
56 topic with children may be different when someone in their own family is nearing end of life.<sup>19</sup>  
57 It is important that HSCPs do not make assumptions that families understand the reality of a  
58  
59  
60

1  
2  
3 relative's declining health or realise how important it is to have honest conversations with  
4 children about illness and death.  
5  
6  
7

8  
9 Bereaved families have reflected it would have been helpful if HSCPs had started a  
10 conversation with them on how best to tell the children someone close to them was going to  
11 die.<sup>2</sup> This would require HSCP to: (1) understand the long-term benefits of effective  
12 communication for children's psychological wellbeing and family functioning; and (2) identify  
13 children within a patient's family and social network. HSCPs should ask their patients and/or  
14 the relatives 'do you have important relationships with children?'. This question should be  
15 universal and not based on a patient's age. While most of the patients in this study were later  
16 in life, the number of relationships an adult has with children is likely to increase with each  
17 successive generation. Additionally, the proportion of grandparents who provide formal or  
18 informal childcare for working parents means this population are significantly involved in the  
19 lives of children.<sup>20</sup> Crucially, when relationships with children are identified, HSCPs must have  
20 the training and resources needed to follow up with adults about *why* talking to children matters  
21 and *how* these conversations can be initiated with children of all ages.  
22  
23  
24  
25  
26  
27  
28  
29  
30  
31

32  
33 This is the first known study that has included quantitative measures about family-  
34 centred conversations in end of life care. It is possible that bereaved relatives did not answer  
35 the survey questions about the children as this may not have been reflective of their family set-  
36 up. This research was embedded in a national survey of end of life experiences during the  
37 COVID-19 pandemic and some of the bereaved relatives interviewed did not have important  
38 relationships with children; however it was considered ethically appropriate in the method  
39 section to report the total number of interviews conducted. Findings are limited to an ethnically  
40 homogenous White population; future studies should investigate the experiences of preparing  
41 children for death from ethnic minority populations. Participants were self-selected to the  
42 survey which can lead to an unrepresentative sample of the overall population included.  
43  
44  
45  
46  
47  
48  
49  
50

## 51 **Conclusion**

52  
53 There was a pronounced difference between bereaved relatives' and HSCPs'  
54 perceptions about identifying children affected by the anticipated death of an important adult  
55 during the COVID-19 pandemic. HSCPs have an important role in supporting families to  
56 initiate conversations with children about end of life in a timely and developmentally-sensitive  
57  
58  
59  
60

manner. This is essential for the long-term psychological wellbeing of bereaved families and children.

## **ACKNOWLEDGEMENTS**

The authors would like to express their sincere thanks and gratitude to the bereaved relatives and professionals that participated in this study. The authors extend their thanks to Rosemary Hughes and Tamsin McGlinchey for conducting the interviews.

## **FUNDING**

The author(s) disclosed receipt of the following financial support for the research, authorship, and/or publication of this article:

There was no direct funding award for conducting this study. Data analysis and manuscript preparation was supported by funding from the Westminster Foundation awarded to University of Oxford.

## **DATA AVAILABILITY STATEMENT**

The data that supports the findings of this study are available at the University of Oxford, University of Liverpool, and University of Sheffield's repositories and available on request from the second author. The data are not publicly available due to privacy and ethical restrictions.

## **ETHICAL STATEMENT**

The study passed ethical committee review from University of Liverpool [Ref: 7761].

## **CONFLICT OF INTEREST**

The author(s) declared no potential conflicts of interest with respect to the research, authorship, and/or publication of this article.

## **PATIENT CONSENT FOR PUBLICATION**

Not required

## **AUTHOR CONTRIBUTIONS**

Five authors were involved in the design of this study, survey dissemination, and data collection [CRM, SM, LJD, ER, JRH]. First interviews were conducted by two female

1  
2  
3 researchers at the University of Liverpool. Second interviews were conducted by JRH. JRH  
4 analysed and interpreted the data. BM supported the quantitative analysis. JRH, ER, LJD  
5 drafted the manuscript. All authors critically reviewed the manuscript. JRH took responsibility  
6 for the submission process. JRH and ER are joint first authors of this paper.  
7  
8  
9

## 10 11 12 **References**

13 [1] Hanna JR, McCaughan E, Semple CJ. Challenges and support needs of parents and children when  
14 a parent is at end of life: a systematic review. *Palliative medicine*. 2019 Sep;33(8):1017-44.

15  
16 <https://doi.org/10.1177/0269216319857622>  
17

18  
19 [2] Semple CJ, McCaughan E, Beck ER, Hanna JR. 'Living in parallel worlds'—bereaved parents'  
20 experience of family life when a parent with dependent children is at end of life from cancer: A  
21 qualitative study. *Palliative Medicine*. 2021 Mar 26:02692163211001719.

22  
23  
24 <https://doi.org/10.1177/02692163211001719>  
25

26  
27 [3] Marshall S, Fearnley R, Bristowe K, Harding R. The perspectives of children and young people  
28 affected by parental life-limiting illness: An integrative review and thematic synthesis. *Palliative*  
29 *Medicine*. 2020 Nov 19:0269216320967590. <https://doi.org/10.1177/0269216320967590>  
30  
31

32  
33 [4] Dalton L, Rapa E, Ziebland S, Rochat T, Kelly B, Hanington L, Bland R, Yousafzai A, Stein A,  
34 Betancourt T, Bluebond-Langner M. Communication with children and adolescents about the  
35 diagnosis of a life-threatening condition in their parent. *The Lancet*. 2019 Mar 16;393(10176):1164-  
36  
37  
38  
39  
40  
41  
42  
43  
44  
45  
46  
47  
48  
49  
50  
51  
52  
53  
54  
55  
56  
57  
58  
59  
60  
76. [https://doi.org/10.1016/S0140-6736\(18\)33201-X](https://doi.org/10.1016/S0140-6736(18)33201-X)

[5] Ellis J, Dowrick C, Lloyd-Williams M. The long-term impact of early parental death: lessons from  
a narrative study. *Journal of the Royal Society of Medicine*. 2013 Feb;106(2):57-67.

<https://doi.org/10.1177/0141076812472623>

[6] Fearnley R, Boland JW. Communication and support from health-care professionals to families,  
with dependent children, following the diagnosis of parental life-limiting illness: a systematic review.  
*Palliative medicine*. 2017 Mar;31(3):212-22. <https://doi.org/10.1177/0269216316655736>

[7] McCaughan E, Semple CJ, Hanna JR. 'Don't forget the children': a qualitative study when a parent  
is at end of life from cancer. *Supportive Care in Cancer*. 2021 Jun 18:1-8.  
<https://doi.org/10.1007/s00520-021-06341-3>

1  
2  
3 [8] Dalton LJ, McNivan A, Hanna JR, Stein A, Rapa E. Family centred communication when an adult  
4 patient is diagnosed with a life-threatening condition. In prep. 2021  
5  
6

7  
8 [9] Hanna JR, McCaughan E, Beck ER, Semple CJ. Providing care to parents dying from cancer with  
9 dependent children: Health and social care professionals' experience. *Psycho-Oncology*. 2021  
10 Mar;30(3):331-9. <https://doi.org/10.1002/pon.5581>  
11  
12

13  
14 [10] Franklin P, Arber A, Reed L, Ream E. Health and social care professionals' experiences of  
15 supporting parents and their dependent children during, and following, the death of a parent: a  
16 qualitative review and thematic synthesis. *Palliative medicine*. 2019 Jan;33(1):49-65.  
17  
18 <https://doi.org/10.1177/0269216318803494>  
19  
20

21  
22 [11] Hanna JR, Rapa E, Dalton LJ, Hughes R, McGlinchey T, Bennett KM, Donnellan WJ, Mason SR,  
23 Mayland CR. A qualitative study of bereaved relatives' end of life experiences during the COVID-19  
24 pandemic. *Palliative Medicine*. 2021 Mar 30:02692163211004210.  
25  
26 <https://doi.org/10.1177/02692163211004210>  
27  
28

29  
30 [12] Hanna JR, Rapa E, Dalton LJ, Hughes R, Quarmby LM, McGlinchey T, Donnellan WJ, Bennett  
31 KM, Mayland CR, Mason SR. Health and social care professionals' experiences of providing end of  
32 life care during the COVID-19 pandemic. *Palliative Medicine*. 2021. May  
33  
34

35  
36 [13] Creswell JW, Tashakkori A. Developing publishable mixed methods manuscripts. [https://doi.org/](https://doi.org/10.1177/1558689806298644)  
37  
38 [10.1177/1558689806298644](https://doi.org/10.1177/1558689806298644)  
39  
40

41  
42 [14] Mayland CR, Hughes R, Lane S, McGlinchey T, Donnellan WJ, Bennett KM, Hanna JR, Rapa E,  
43 Dalton LJ, Mason SR. Are public health measures and individualised care compatible in the face of a  
44 pandemic? A national observational study of bereaved relatives' experiences during the COVID-19  
45 pandemic. *Palliative Medicine*. 2021 May 31 <https://doi.org/10.1177/02692163211019885>  
46  
47

48  
49 [15] Braun V, Clarke V. Reflecting on reflexive thematic analysis. *Qualitative Research in Sport,*  
50 *Exercise and Health*. 2019 Aug 8;11(4):589-97.  
51  
52

53  
54 [16] Walshe C. Mixed method research in palliative care. In: MacLeod R, Van den Block L (Eds).  
55 *Textbook of Palliative Care*. Springer, Cham. [https://doi.org/10.1007/978-3-319-77740-5\\_109](https://doi.org/10.1007/978-3-319-77740-5_109).  
56  
57  
58  
59  
60

[17] Kennedy VL, Lloyd-Williams M. Information and communication when a parent has advanced cancer. *Journal of affective disorders*. 2009 Apr 1;114(1-3):149-55.

<https://doi.org/10.1016/j.jad.2008.06.022>

[18] Geerse OP, Lamas DJ, Sanders JJ, Paladino J, Kavanagh J, Henrich NJ, Berendsen AJ, Hiltermann TJ, Fromme EK, Bernacki RE, Block SD. A qualitative study of serious illness conversations in patients with advanced cancer. *Journal of palliative medicine*. 2019 Jul 1;22(7):773-81. <https://doi.org/10.1089/jpm.2018.0487>

[19] Caughlin JP, Mikucki-Enyart SL, Middleton AV, Stone AM, Brown LE. Being open without talking about it: A rhetorical/normative approach to understanding topic avoidance in families after a lung cancer diagnosis. *Communication Monographs*. 2011 Dec 1;78(4):409-36.

<https://doi.org/10.1080/03637751.2011.618141>

[20] Buchanan A, Rotkirch A. 'Twenty-first century grandparents: global perspectives on changing roles and consequences.' *Contemporary Social Science*. 2018; 13(2), 131-144.

<https://doi.org/10.1080/21582041.2018.1467034>.

**Table 1: Semi-structured topic guide used to guide the conduct of the study**

**Initial topics based on the literature and study aims and objectives**

- Exploration of end of life experiences during the COVID-19 pandemic.
- Exploration of how relatives managed the final weeks and days of life with their dependent children.
- Exploration of the needs of families as they prepared children for a death during the COVID-19 pandemic.
- Exploration of professionals' perceptions of the needs of families as they prepared children for death during the COVID-19 pandemic.
- Exploration of professionals' perceptions of the psychosocial needs of families when a relative was dying during the pandemic in relation to their children.

**Sample of additional topics for follow-up interviews**

- Professionals' role in providing psychological support to families at end of life about important relationships with dependent children.
- Professionals' role in signposting families to family support services during the COVID-19 pandemic.
- Families' engagement with family support services when a relative was at end of life during the COVID-19 pandemic.
- Children's involvement in the family when a relative was at end of life during the COVID-19 pandemic.

**Table 2: Survey responses from bereaved relatives**

|                                                       | <b>Total<br/>responders</b> | <b>Yes,<br/>certainly<br/>(%)</b> | <b>Yes,<br/>probably<br/>(%)</b> | <b>No,<br/>probably<br/>not<br/>(%)</b> | <b>No,<br/>certainly<br/>not<br/>(%)</b> |
|-------------------------------------------------------|-----------------------------|-----------------------------------|----------------------------------|-----------------------------------------|------------------------------------------|
| Q. Was the person who died infected with Coronavirus? | 256                         | 82<br>(32%)                       | 28<br>(11%)                      | 54<br>(21.1%)                           | 92<br>(35.9%)                            |

**Table 3: Characteristics of the bereaved relatives and HSCPs who completed the survey**

| <b>Characteristics of HSCPs surveyed</b> | <i>N</i> | <b>Characteristics of bereaved relatives survey</b>              | <i>N</i> |
|------------------------------------------|----------|------------------------------------------------------------------|----------|
| <b>Professional role</b>                 |          | <b>Gender of participant</b>                                     |          |
| Doctor                                   | 114      | Female                                                           | 216      |
| Nurse                                    | 155      | Male                                                             | 59       |
| Pharmacist                               | 1        | Non-binary                                                       | 1        |
| Physiotherapist                          | 13       | Other                                                            | 1        |
| Occupational therapist                   | 2        | Missing                                                          | 1        |
| Chaplain                                 | 5        | <b>Participant's relationship to the family member that died</b> |          |
| Speech and language therapist            | 4        | Son/daughter                                                     | 174      |
| Dietician                                | 1        | Spouse / partner                                                 | 22       |
| Social care professional                 | 2        | Parent                                                           | 4        |
| Healthcare assistant                     | 23       | Son/daughter in-law                                              | 12       |
| Volunteer                                | 5        | Niece/nephew                                                     | 13       |
| Other (no details / free text provided)  | 13       | Grandchild                                                       | 19       |
| Missing                                  | 5        | Sibling                                                          | 6        |
| <b>Location of professional</b>          |          | Friend                                                           | 14       |
| England                                  | 247      | Other                                                            | 14       |
| Scotland                                 | 58       | <b>Location of death</b>                                         |          |
| Wales                                    | 7        | England                                                          | 179      |
| Northern Ireland                         | 25       | Scotland                                                         | 63       |
| Missing                                  | 8        | Wales                                                            | 10       |
|                                          |          | Northern Ireland                                                 | 7        |
|                                          |          | Missing                                                          | 19       |
|                                          |          | <b>Place of death</b>                                            |          |
|                                          |          | Hospital                                                         | 75       |
|                                          |          | <i>General ward (n = 34)</i>                                     |          |
|                                          |          | <i>Intensive care unit (n = 13)</i>                              |          |
|                                          |          | <i>Coronavirus ward (n = 26)</i>                                 |          |
|                                          |          | <i>Other (n = 2)</i>                                             |          |
|                                          |          | Usual place of care                                              | 192      |
|                                          |          | <i>Home (n = 30)</i>                                             |          |
|                                          |          | <i>Care home (n = 162)</i>                                       |          |



|  |                                                           |    |
|--|-----------------------------------------------------------|----|
|  | Hospice                                                   | 10 |
|  | Missing                                                   | 1  |
|  | <b>Was the person who died infected with Coronavirus?</b> |    |
|  | Yes, certainly                                            | 82 |
|  | Yes, probably                                             | 28 |
|  | No, probably not                                          | 54 |
|  | No, certainly not                                         | 92 |
|  | Missing                                                   | 22 |

**Table 4: Characteristics of the bereaved relatives and HSCPs interviewed in the study recruited to the study**

| <b>Characteristics of HSCPs interviewed</b> | <i>N</i> | <b>Characteristics of bereaved relatives interviewed</b>         | <i>N</i> |
|---------------------------------------------|----------|------------------------------------------------------------------|----------|
| <b>Hospital based professionals</b>         |          | <b>Gender of participant</b>                                     |          |
| Palliative care social worker               | 1        | Female                                                           | 12       |
| Palliative care consultant                  | 1        | Male                                                             | 7        |
| Palliative care clinical nurse specialist   | 2        |                                                                  |          |
| Palliative care team leader (nurse)         | 1        | <b>Participant's relationship to the family member that died</b> |          |
| Registered nurse                            | 1        | Spouse/partner                                                   | 4        |
| Healthcare chaplain                         | 1        | Adult child                                                      | 11       |
| Healthcare assistant                        | 1        | Adult grandchild                                                 | 1        |
| Junior doctor                               | 2        | Son/daughter in-law                                              | 2        |
|                                             |          | Niece                                                            | 1        |
| <b>Care home based professionals</b>        |          |                                                                  |          |
| Registered nurse                            | 2        | <b>Ethnicity of relative/deceased</b>                            |          |
| Palliative care registered nurse            | 1        | White                                                            | 19       |
|                                             |          | (English/Welsh/Scottish/Northern Irish/British)                  |          |
| <b>Hospice based professionals</b>          |          |                                                                  |          |
| Palliative care clinical nurse specialist   | 1        | <b>Location of relative/death</b>                                |          |
| Palliative care consultant                  | 1        | England                                                          | 14       |
| Palliative care nurse                       | 1        | Scotland                                                         | 4        |
|                                             |          | Wales                                                            | 1        |
| <b>Location of professional</b>             |          | Northern Ireland                                                 | 0        |
| England                                     | 8        |                                                                  |          |
| Scotland                                    | 5        | <b>Place of death</b>                                            |          |
| Wales                                       | 2        | Hospital                                                         | 10       |
| Northern Ireland                            | 1        | General ward ( <i>n</i> = 3)                                     |          |
|                                             |          | Intensive care unit ( <i>n</i> = 4)                              |          |
| <b>Gender of professional</b>               |          | Coronavirus ward ( <i>n</i> = 3)                                 |          |
| Female                                      | 11       | Care home                                                        | 9        |
| Male                                        | 5        |                                                                  |          |
|                                             |          |                                                                  |          |
| <b>Ethnicity of professional</b>            |          |                                                                  |          |
|                                             | 16       |                                                                  |          |

|                                                             |                                                    |   |
|-------------------------------------------------------------|----------------------------------------------------|---|
| White<br>(English/Welsh/Scottish/Northern<br>Irish/British) | <b>Chronic condition of deceased family member</b> | 8 |
|                                                             | Dementia                                           | 4 |
|                                                             | Cancer                                             | 3 |
|                                                             | Heart failure                                      | 2 |
|                                                             | COPD                                               | 1 |
|                                                             | Renal disease                                      | 1 |
|                                                             | None identified                                    |   |
|                                                             | <b>Age of participant</b>                          | 1 |
|                                                             | 20 – 29                                            | 2 |
|                                                             | 30 – 39                                            | 1 |
|                                                             | 40 – 49                                            | 8 |
|                                                             | 50 – 59                                            | 6 |
|                                                             | 60 – 69                                            | 1 |
|                                                             | 70 – 79                                            |   |
|                                                             | <b>Age of family member that died</b>              | 1 |
|                                                             | 50 – 59                                            | 2 |
|                                                             | 60 – 69                                            | 2 |
| 70 – 79                                                     | 9                                                  |   |
| 80 – 89                                                     | 3                                                  |   |
| 90+                                                         |                                                    |   |
| <b>Age of the children</b>                                  | 15                                                 |   |
| 0 – 11 years old                                            | 9                                                  |   |
| 12 – 18 years old                                           |                                                    |   |

**Table 5: Survey responses from HSCPs**

|                                                                                                                                 | <b>Total responders</b> | <b>Yes, definitely (%)</b> | <b>Yes, probably (%)</b> | <b>No, probably not (%)</b> | <b>No, definitely not (%)</b> | <b>I don't know (%)</b> |
|---------------------------------------------------------------------------------------------------------------------------------|-------------------------|----------------------------|--------------------------|-----------------------------|-------------------------------|-------------------------|
| Q. Did the healthcare team ask whether the patient had important relationships with children or young adults (age 0 –18 years)? | 105                     | 39<br>(37.1%)              | 33<br>(31.4%)            | 7<br>(6.7%)                 | 7<br>(6.7%)                   | 19<br>(18.1%)           |

**Table 6: Survey responses from bereaved relatives**

|                                                                                                                                        | <b>Total responders</b> | <b>Yes (%)</b> | <b>No (%)</b> |
|----------------------------------------------------------------------------------------------------------------------------------------|-------------------------|----------------|---------------|
| Q. Did anyone in the healthcare team ask if your relative/friend had any important relationships with children (age 0 – 18 years old)? | 108                     | 11<br>(10.2%)  | 97<br>(89.8%) |

**Table 7: Survey responses from HSCPs**

|                                                                                                                                                             | <b>Total responders</b> | <b>Excellent (%)</b> | <b>Good (%)</b> | <b>Fair (%)</b> | <b>Poor (%)</b> | <b>I don't know (%)</b> |
|-------------------------------------------------------------------------------------------------------------------------------------------------------------|-------------------------|----------------------|-----------------|-----------------|-----------------|-------------------------|
| Q. How would you assess the overall level of support given by the healthcare team to relatives/friends about talking to children about a patient's illness? | 65                      | 11<br>(16.9%)        | 10<br>(15.4%)   | 6<br>(9.2%)     | 4<br>(6.2%)     | 34<br>(52.3%)           |

**Table 8: Survey responses from bereaved relatives**

|                                                                                                                       | <b>Total responders</b> | <b>Strongly agree (%)</b> | <b>Agree (%)</b> | <b>Neither agree nor disagree (%)</b> | <b>Disagree (%)</b> | <b>Strongly disagree (%)</b> |
|-----------------------------------------------------------------------------------------------------------------------|-------------------------|---------------------------|------------------|---------------------------------------|---------------------|------------------------------|
| Q. I was given enough help and support by the healthcare team to talk to children about my relative/friend's illness? | 75                      | 9<br>(12%)                | 4<br>(5.3%)      | 23<br>(30.7%)                         | 19<br>(25.3%)       | 20<br>(26.7%)                |

**\*\*Figure Legend\*\***

Figure 1: Flowchart illustrating the participants involved in the quantitative and qualitative phases of this study. In phase one, a total of 623 respondents completed the quantitative survey, comprising of 278 bereaved relatives and 345 HSCPs. In phase two, 35 qualitative interviews were conducted; of which 19 were bereaved relatives and 16 were HSCPs.

1  
2  
3  
4  
5  
6  
7  
8  
9  
10  
11  
12  
13  
14  
15  
16  
17  
18  
19  
20  
21  
22  
23  
24  
25  
26  
27  
28  
29  
30  
31  
32  
33  
34  
35  
36  
37  
38  
39  
40  
41  
42  
43  
44  
45  
46  
47  
48  
49  
50  
51  
52  
53  
54  
55  
56  
57  
58  
59  
60

For peer review only

1  
2  
3  
4  
5  
6  
7  
8  
9  
10  
11  
12  
13  
14  
15  
16  
17  
18  
19  
20  
21  
22  
23  
24  
25  
26  
27  
28  
29  
30  
31  
32  
33  
34  
35  
36  
37  
38  
39  
40  
41  
42  
43  
44  
45  
46  
47  
48  
49  
50  
51  
52  
53  
54  
55  
56  
57  
58  
59  
60

Figure 1: Flowchart illustrating the participants involved in the quantitative and qualitative phases of this study. In phase one, a total of 623 respondents completed the quantitative survey, comprising of 278 bereaved relatives and 345 HSCPs. In phase two, 35 qualitative interviews were conducted; of which 19 were bereaved relatives and 16 were HSCPs.



1  
2  
3 **Supplementary file**  
4  
5  
6

7 **Family-centred questions included in the survey for bereaved relatives.**

8 **1. Did anyone in the healthcare team ask if your relative/friend had any important**  
9 **relationships with children (age 0 – 18 years)?**

10  
11  
12 Yes / No  
13  
14

15 **2. I was given enough help and support by the healthcare team to talk to children about**  
16 **my relative/friend's illness?**

17  
18  
19 Strongly agree / Agree / Neither agree nor disagree / Disagree / Strongly disagree  
20  
21

22 **Family-centred questions included in the survey for HSCPs.**

23  
24  
25  
26 **1. Did the healthcare team ask whether the patient had important relationships with**  
27 **children or young adults (age 0 –18 years)?**

28  
29 Yes, definitely / Yes, probably / No, probably not / No, definitely not / I don't know  
30  
31

32  
33 **2. How would you assess the overall level of support given by the healthcare team to**  
34 **relatives/friends about talking to children about a patient's illness?**

35  
36 Excellent / Good / Fair/ Poor / I don't know  
37  
38  
39  
40  
41  
42  
43  
44  
45  
46  
47  
48  
49  
50  
51  
52  
53  
54  
55  
56  
57  
58  
59  
60

## Standards for Reporting Qualitative Research (SRQR)\*

<http://www.equator-network.org/reporting-guidelines/srqr/>

Page/line no(s).

### Title and abstract

|                                                                                                                                                                                                                                                              |   |
|--------------------------------------------------------------------------------------------------------------------------------------------------------------------------------------------------------------------------------------------------------------|---|
| <p><b>Title</b> - Concise description of the nature and topic of the study Identifying the study as qualitative or indicating the approach (e.g., ethnography, grounded theory) or data collection methods (e.g., interview, focus group) is recommended</p> | 1 |
| <p><b>Abstract</b> - Summary of key elements of the study using the abstract format of the intended publication; typically includes background, purpose, methods, results, and conclusions</p>                                                               | 3 |

### Introduction

|                                                                                                                                                                     |   |
|---------------------------------------------------------------------------------------------------------------------------------------------------------------------|---|
| <p><b>Problem formulation</b> - Description and significance of the problem/phenomenon studied; review of relevant theory and empirical work; problem statement</p> | 4 |
| <p><b>Purpose or research question</b> - Purpose of the study and specific objectives or questions</p>                                                              | 4 |

### Methods

|                                                                                                                                                                                                                                                                                                                                                                                                             |     |
|-------------------------------------------------------------------------------------------------------------------------------------------------------------------------------------------------------------------------------------------------------------------------------------------------------------------------------------------------------------------------------------------------------------|-----|
| <p><b>Qualitative approach and research paradigm</b> - Qualitative approach (e.g., ethnography, grounded theory, case study, phenomenology, narrative research) and guiding theory if appropriate; identifying the research paradigm (e.g., postpositivist, constructivist/ interpretivist) is also recommended; rationale**</p>                                                                            | 4/5 |
| <p><b>Researcher characteristics and reflexivity</b> - Researchers' characteristics that may influence the research, including personal attributes, qualifications/experience, relationship with participants, assumptions, and/or presuppositions; potential or actual interaction between researchers' characteristics and the research questions, approach, methods, results, and/or transferability</p> | 6   |
| <p><b>Context</b> - Setting/site and salient contextual factors; rationale**</p>                                                                                                                                                                                                                                                                                                                            | 6   |
| <p><b>Sampling strategy</b> - How and why research participants, documents, or events were selected; criteria for deciding when no further sampling was necessary (e.g., sampling saturation); rationale**</p>                                                                                                                                                                                              | 6   |
| <p><b>Ethical issues pertaining to human subjects</b> - Documentation of approval by an appropriate ethics review board and participant consent, or explanation for lack thereof; other confidentiality and data security issues</p>                                                                                                                                                                        | 7   |
| <p><b>Data collection methods</b> - Types of data collected; details of data collection procedures including (as appropriate) start and stop dates of data collection and analysis, iterative process, triangulation of sources/methods, and modification of procedures in response to evolving study findings; rationale**</p>                                                                             | 6   |

|                       |                                                                                                                                                                                                                                                       |     |
|-----------------------|-------------------------------------------------------------------------------------------------------------------------------------------------------------------------------------------------------------------------------------------------------|-----|
| 1<br>2<br>3<br>4<br>5 | <b>Data collection instruments and technologies</b> - Description of instruments (e.g., interview guides, questionnaires) and devices (e.g., audio recorders) used for data collection; if/how the instrument(s) changed over the course of the study | 6   |
| 6<br>7<br>8           | <b>Units of study</b> - Number and relevant characteristics of participants, documents, or events included in the study; level of participation (could be reported in results)                                                                        | 6   |
| 9<br>10<br>11<br>12   | <b>Data processing</b> - Methods for processing data prior to and during analysis, including transcription, data entry, data management and security, verification of data integrity, data coding, and anonymization/de-identification of excerpts    | 6/7 |
| 13<br>14<br>15<br>16  | <b>Data analysis</b> - Process by which inferences, themes, etc., were identified and developed, including the researchers involved in data analysis; usually references a specific paradigm or approach; rationale**                                 | 6/7 |
| 17<br>18<br>19<br>20  | <b>Techniques to enhance trustworthiness</b> - Techniques to enhance trustworthiness and credibility of data analysis (e.g., member checking, audit trail, triangulation); rationale**                                                                | 6/7 |

## Results/findings

|                      |                                                                                                                                                                                                   |      |
|----------------------|---------------------------------------------------------------------------------------------------------------------------------------------------------------------------------------------------|------|
| 23<br>24<br>25<br>26 | <b>Synthesis and interpretation</b> - Main findings (e.g., interpretations, inferences, and themes); might include development of a theory or model, or integration with prior research or theory | 7-13 |
| 27<br>28<br>29       | <b>Links to empirical data</b> - Evidence (e.g., quotes, field notes, text excerpts, photographs) to substantiate analytic findings                                                               | 7-13 |

## Discussion

|                                  |                                                                                                                                                                                                                                                                                                                                                                                                             |       |
|----------------------------------|-------------------------------------------------------------------------------------------------------------------------------------------------------------------------------------------------------------------------------------------------------------------------------------------------------------------------------------------------------------------------------------------------------------|-------|
| 32<br>33<br>34<br>35<br>36<br>37 | <b>Integration with prior work, implications, transferability, and contribution(s) to the field</b> - Short summary of main findings; explanation of how findings and conclusions connect to, support, elaborate on, or challenge conclusions of earlier scholarship; discussion of scope of application/generalizability; identification of unique contribution(s) to scholarship in a discipline or field | 13-15 |
| 38<br>39                         | <b>Limitations</b> - Trustworthiness and limitations of findings                                                                                                                                                                                                                                                                                                                                            | 15    |

## Other

|                |                                                                                                                                               |    |
|----------------|-----------------------------------------------------------------------------------------------------------------------------------------------|----|
| 42<br>43<br>44 | <b>Conflicts of interest</b> - Potential sources of influence or perceived influence on study conduct and conclusions; how these were managed | 16 |
| 45<br>46       | <b>Funding</b> - Sources of funding and other support; role of funders in data collection, interpretation, and reporting                      | 16 |

\*The authors created the SRQR by searching the literature to identify guidelines, reporting standards, and critical appraisal criteria for qualitative research; reviewing the reference lists of retrieved sources; and contacting experts to gain feedback. The SRQR aims to improve the transparency of all aspects of qualitative research by providing clear standards for reporting qualitative research.



\*\*The rationale should briefly discuss the justification for choosing that theory, approach, method, or technique rather than other options available, the assumptions and limitations implicit in those choices, and how those choices influence study conclusions and transferability. As appropriate, the rationale for several items might be discussed together.

**Reference:**

O'Brien BC, Harris IB, Beckman TJ, Reed DA, Cook DA. **Standards for reporting qualitative research: a synthesis of recommendations.** *Academic Medicine*, Vol. 89, No. 9 / Sept 2014  
DOI: 10.1097/ACM.0000000000000388

STROBE Statement—checklist of items that should be included in reports of observational studies

|                           | Item No | Recommendation                                                                                                                                                                                                                                                                                                          | Page No |
|---------------------------|---------|-------------------------------------------------------------------------------------------------------------------------------------------------------------------------------------------------------------------------------------------------------------------------------------------------------------------------|---------|
| <b>Title and abstract</b> | 1       | (a) Indicate the study's design with a commonly used term in the title or the abstract                                                                                                                                                                                                                                  | 1       |
|                           |         | (b) Provide in the abstract an informative and balanced summary of what was done and what was found                                                                                                                                                                                                                     | 3       |
| <b>Introduction</b>       |         |                                                                                                                                                                                                                                                                                                                         |         |
| Background/rationale      | 2       | Explain the scientific background and rationale for the investigation being reported                                                                                                                                                                                                                                    | 4       |
| Objectives                | 3       | State specific objectives, including any prespecified hypotheses                                                                                                                                                                                                                                                        | 4       |
| <b>Methods</b>            |         |                                                                                                                                                                                                                                                                                                                         |         |
| Study design              | 4       | Present key elements of study design early in the paper                                                                                                                                                                                                                                                                 | 4/5     |
| Setting                   | 5       | Describe the setting, locations, and relevant dates, including periods of recruitment, exposure, follow-up, and data collection                                                                                                                                                                                         | 5       |
| Participants              | 6       | (a) <i>Cohort study</i> —Give the eligibility criteria, and the sources and methods of selection of participants. Describe methods of follow-up                                                                                                                                                                         | 5       |
|                           |         | <i>Case-control study</i> —Give the eligibility criteria, and the sources and methods of case ascertainment and control selection. Give the rationale for the choice of cases and controls<br><br><i>Cross-sectional study</i> —Give the eligibility criteria, and the sources and methods of selection of participants |         |
|                           |         | (b) <i>Cohort study</i> —For matched studies, give matching criteria and number of exposed and unexposed                                                                                                                                                                                                                |         |
|                           |         | <i>Case-control study</i> —For matched studies, give matching criteria and the number of controls per case                                                                                                                                                                                                              |         |
| Variables                 | 7       | Clearly define all outcomes, exposures, predictors, potential confounders, and effect modifiers. Give diagnostic criteria, if applicable                                                                                                                                                                                | 5/6     |

|                            |                                       |    |                                                                                                                                                                                               |     |
|----------------------------|---------------------------------------|----|-----------------------------------------------------------------------------------------------------------------------------------------------------------------------------------------------|-----|
| 1<br>2<br>3<br>4           | Data sources/<br>measurement          | 8* | For each variable of interest, give sources of data and details of methods of assessment (measurement). Describe comparability of assessment methods if there is more than one group          |     |
| 5<br>6                     | Bias                                  | 9  | Describe any efforts to address potential sources of bias                                                                                                                                     | n/a |
| 7<br>8                     | Study size                            | 10 | Explain how the study size was arrived at                                                                                                                                                     | n/a |
| 9<br>10<br>11              | Quantitative variables                | 11 | Explain how quantitative variables were handled in the analyses. If applicable, describe which groupings were chosen and why                                                                  | 6   |
| 12<br>13                   | Statistical methods                   | 12 | (a) Describe all statistical methods, including those used to control for confounding                                                                                                         | 6   |
| 14<br>15                   |                                       |    | (b) Describe any methods used to examine subgroups and interactions                                                                                                                           | n/a |
| 16<br>17                   |                                       |    | (c) Explain how missing data were addressed                                                                                                                                                   | n/a |
| 18<br>19<br>20<br>21<br>22 |                                       |    | (d) <i>Cohort study</i> —If applicable, explain how loss to follow-up was addressed<br><br><i>Case-control study</i> —If applicable, explain how matching of cases and controls was addressed | n/a |
| 23<br>24<br>25             |                                       |    | <i>Cross-sectional study</i> —If applicable, describe analytical methods taking account of sampling strategy                                                                                  |     |
| 26<br>27                   | (e) Describe any sensitivity analyses |    |                                                                                                                                                                                               |     |

Continued on next page

| <b>Results</b> |                          |     |                                                                                                                                                                                                              |       |
|----------------|--------------------------|-----|--------------------------------------------------------------------------------------------------------------------------------------------------------------------------------------------------------------|-------|
| 1              | Participants             | 13* | (a) Report numbers of individuals at each stage of study—eg numbers potentially eligible, examined for eligibility, confirmed eligible, included in the study, completing follow-up, and analysed            | 7     |
| 2              |                          |     | (b) Give reasons for non-participation at each stage                                                                                                                                                         | 7     |
| 3              |                          |     | (c) Consider use of a flow diagram                                                                                                                                                                           | n/a   |
| 4              | Descriptive data         | 14* | (a) Give characteristics of study participants (eg demographic, clinical, social) and information on exposures and potential confounders                                                                     | 7     |
| 5              |                          |     | (b) Indicate number of participants with missing data for each variable of interest                                                                                                                          | 7     |
| 6              |                          |     | (c) <i>Cohort study</i> —Summarise follow-up time (eg, average and total amount)                                                                                                                             | na    |
| 7              | Outcome data             | 15* | <i>Cohort study</i> —Report numbers of outcome events or summary measures over time                                                                                                                          | na    |
| 8              |                          |     | <i>Case-control study</i> —Report numbers in each exposure category, or summary measures of exposure                                                                                                         | na    |
| 9              |                          |     | <i>Cross-sectional study</i> —Report numbers of outcome events or summary measures                                                                                                                           | na    |
| 10             | Main results             | 16  | (a) Give unadjusted estimates and, if applicable, confounder-adjusted estimates and their precision (eg, 95% confidence interval). Make clear which confounders were adjusted for and why they were included | 7-13  |
| 11             |                          |     | (b) Report category boundaries when continuous variables were categorized                                                                                                                                    | na    |
| 12             |                          |     | (c) If relevant, consider translating estimates of relative risk into absolute risk for a meaningful time period                                                                                             | na    |
| 13             | Other analyses           | 17  | Report other analyses done—eg analyses of subgroups and interactions, and sensitivity analyses                                                                                                               | 7-13  |
| 14             | <b>Discussion</b>        |     |                                                                                                                                                                                                              |       |
| 15             | Key results              | 18  | Summarise key results with reference to study objectives                                                                                                                                                     | 13-15 |
| 16             | Limitations              | 19  | Discuss limitations of the study, taking into account sources of potential bias or imprecision. Discuss both direction and magnitude of any potential bias                                                   | 15    |
| 17             | Interpretation           | 20  | Give a cautious overall interpretation of results considering objectives, limitations, multiplicity of analyses, results from similar studies, and other relevant evidence                                   | 14-15 |
| 18             | Generalisability         | 21  | Discuss the generalisability (external validity) of the study results                                                                                                                                        | 14-15 |
| 19             | <b>Other information</b> |     |                                                                                                                                                                                                              |       |
| 20             | Funding                  | 22  | Give the source of funding and the role of the funders for the present study and, if applicable, for the original study on which the present article is based                                                | 15    |

1 \*Give information separately for cases and controls in case-control studies and, if applicable, for exposed and unexposed groups in  
2 cohort and cross-sectional studies.  
3

4 **Note:** An Explanation and Elaboration article discusses each checklist item and gives methodological background and published  
5 examples of transparent reporting. The STROBE checklist is best used in conjunction with this article (freely available on the Web  
6 sites of PLoS Medicine at <http://www.plosmedicine.org/>, Annals of Internal Medicine at <http://www.annals.org/>, and Epidemiology at  
7 <http://www.epidem.com/>). Information on the STROBE Initiative is available at [www.strobe-statement.org](http://www.strobe-statement.org).  
8  
9  
10  
11  
12  
13  
14  
15  
16  
17  
18  
19  
20  
21  
22  
23  
24  
25  
26  
27  
28  
29  
30  
31  
32  
33  
34  
35  
36  
37  
38  
39  
40  
41  
42  
43  
44  
45  
46  
47  
48  
49  
50  
51  
52  
53  
54  
55  
56  
57  
58  
59  
60

For peer review only
