# Supplementary material for: Experiences of preparing children for a death of an important adult during the COVID-19 pandemic: a mixed methods study
Source: PubMed Central journal article supplement — BMJ Open. 2021 Aug 16;11(8):e053099. doi: 10.1136/bmjopen-2021-053099 (PMC8370837; doi:10.1136/bmjopen-2021-053099), 2021-08-16
Supplement: bmjopen-2021-053099supp001.pdf [file bmjopen-2021-053099supp001.pdf]

## Supplementary file

### **Family-centred questions included in the survey for bereaved relatives.**

**1. Did anyone in the healthcare team ask if your relative/friend had any important relationships with children (age 0 – 18 years)?**

Yes / No

**2. I was given enough help and support by the healthcare team to talk to children about my relative/friend's illness?**

Strongly agree / Agree / Neither agree nor disagree / Disagree / Strongly disagree

### **Family-centred questions included in the survey for HSCPs.**

**1. Did the healthcare team ask whether the patient had important relationships with children or young adults (age 0 –18 years)?**

Yes, definitely / Yes, probably / No, probably not / No, definitely not / I don't know

**2. How would you assess the overall level of support given by the healthcare team to relatives/friends about talking to children about a patient's illness?**

Excellent / Good / Fair/ Poor / I don't know
